1 **A role for the Smc3 hinge domain in the maintenance of sister chromatid**  
2 **cohesion**

3

4 Brett Robison, Vincent Guacci, and Douglas Koshland

5 Department of Molecular and Cell Biology, University of California, Berkeley

6 Berkeley, CA 94720

7

8

9

10

11

12

13

14

15

16

17

18

19

20

21

22

23

24

25 Running Title: Functions of the Smc3 hinge

26 Keywords: sister chromatid cohesion, condensation, cohesin, Smc3, hinge, Pds5, Eco1

27 Corresponding Author: Douglas Koshland

28 Mailing Address: 408 Barker Hall, UC Berkeley, Berkeley, CA 94720

29 Phone Number: (510) 643-9593

30 Email address: [koshland@berkeley.edu](mailto:koshland@berkeley.edu)

31

32

33

34

35

36

37

38

39

40

41

42

43

44

45

46

47

## 48 **Abstract**

49 Cohesin is a conserved protein complex required for sister chromatid cohesion,  
50 chromosome condensation, DNA damage repair, and regulation of transcription.  
51 Although cohesin functions to tether DNA duplexes, the contribution of its individual  
52 domains to this activity remains poorly understood. We interrogated the Smc3p subunit  
53 of cohesin by random insertion mutagenesis. Analysis of a mutant in the Smc3p hinge  
54 revealed an unexpected role for this domain in cohesion maintenance and  
55 condensation. Further investigation revealed that the Smc3p hinge functions at a step  
56 following cohesin's stable binding to chromosomes and independently of Smc3p's  
57 regulation by the Eco1p acetyltransferase. Hinge mutant phenotypes resemble loss of  
58 Pds5p, which binds opposite the hinge near Smc3p's head domain. We propose that a  
59 specific conformation of the Smc3p hinge and Pds5p cooperate to promote cohesion  
60 maintenance and condensation.

61

## 62 **Introduction**

63 Cohesin is a conserved protein complex required for sister chromatid cohesion,  
64 chromosome condensation, DNA damage repair, and regulation of transcription (Onn et  
65 al. 2008). To accomplish these functions, chromosome-bound cohesin tethers two  
66 distinct DNA duplexes or two sites on a single DNA duplex. A remarkable feature of  
67 cohesin-mediated tethers is that they must persist for long periods. For example, once  
68 generated, cohesion between sister chromatids must be maintained for up to several  
69 hours until cells progress through mitosis. Cohesion maintenance is essential for a

70 successful mitosis since it ensures bipolar attachment and proper segregation of  
71 chromosomes. This process is crucial in mammalian oocytes since cohesion must be  
72 maintained from its establishment during meiotic prophase I, which occurs during fetal  
73 development, until the egg is fertilized in adulthood. Failure to maintain this cohesion  
74 can lead to aneuploidy and may cause infertility and birth defects in humans (Duncan et  
75 al. 2012). However, despite its critical function, the mechanism and regulation of  
76 cohesion maintenance remains poorly understood.

77 Cohesin is a large multi-subunit complex with an elaborate molecular  
78 architecture. In the budding yeast *Saccharomyces cerevisiae*, core cohesin subunits are  
79 Smc1p, Smc3p, Mcd1p (also called Scc1p), and Scc3p (Onn et al. 2008). The Structural  
80 Maintenance of Chromosome (Smc) proteins fold back on themselves to form large  
81 dumbbell-shaped structures with two globular domains, referred to as the head and  
82 hinge, separated by an ~45 nm long coiled coil (Onn et al. 2008). Cohesin or purified  
83 Smc1p-Smc3p heterodimers have been visualized by electron microscopy, atomic-force  
84 microscopy, and scanning-force microscopy (Haering et al. 2002; Sakai et al. 2003;  
85 Kulemzina et al. 2016). These studies revealed that Smc1p and Smc3p dimerize by an  
86 interaction between their heads and a separate interaction between their hinges.  
87 Dimerization of the heads is further stabilized by the kleisin subunit Mcd1p which binds  
88 through its N-terminus to Smc3p and its C-terminus to Smc1p (Haering et al. 2002).  
89 The existence of two dimerization interfaces allows cohesin to form large rings. This  
90 ring structure likely explains cohesin's ability to bind DNA by topological entrapment. In  
91 addition to these ring structures, more complex conformations have also been observed

92 (Sakai et al. 2003). Evidence supporting the biological significance of these other  
93 conformations has been lacking.

94 Sister chromatid cohesion is established in S phase then maintained until  
95 anaphase onset. Cohesion establishment is a multi-step process. In budding yeast, the  
96 Scc2p/Scc4p complex (Ciosk et al. 2000) loads cohesin onto DNA at centromeres and  
97 along chromosome arms at cohesin-associated regions or CARs in early S phase  
98 (Megee et al. 1999; Laloraya et al. 2000; Glynn et al. 2004). During S phase, DNA-  
99 bound cohesin is converted into a form that tethers sister chromatids by the Eco1p  
100 acetyltransferase, which acetylates Smc3p at lysines 112 and 113 (Toth et al. 1999;  
101 Skibbens et al. 1999; Ünal et al. 2008; Ben-Shahar et al. 2008; Zhang et al. 2008).  
102 Once cohesion is established in S phase, the cohesion-associated regulator Pds5p is  
103 required to maintain cohesion until anaphase onset (Hartman et al. 2000; Panizza et al.  
104 2000; Stead et al. 2003).

105 The mechanism of cohesion maintenance is only partially understood. Pds5p co-  
106 localizes with cohesin on chromosomes and when mutated, causes a decrease in  
107 cohesin binding to chromosomes, a reduction in cellular Mcd1p levels, and a cohesion  
108 maintenance defect (Hartman et al. 2000; Panizza et al. 2000). This maintenance defect  
109 can be suppressed by preventing premature Mcd1p degradation via a polySUMO-  
110 dependent pathway, or preserving Smc3p acetylation by deleting the *HOS1* deacetylase  
111 (Stead et al. 2003; D'Ambrosio et al. 2014; Chan et al. 2013). Thus, Pds5p may function  
112 to protect cohesin complex from factors that could dissolve cohesion. However,  
113 cohesion maintenance is a more complex process. The cohesin mutant Mcd1-ROCC is  
114 defective for cohesion maintenance yet Mcd1p levels are not reduced and Pds5p

115 recruitment to cohesin and chromosomes is unaffected (Eng et al. 2014). These  
116 observations suggest that an additional step beyond Mcd1p stabilization or Pds5p  
117 recruitment is required for cohesion maintenance.

118 A clue for this additional step comes from imaging and biochemical studies of  
119 cohesin and Pds5p. Biochemical studies indicate Pds5p binds to Mcd1p, placing Pds5p  
120 adjacent to the Smc head domains (Chan et al. 2013; Lee et al. 2016; Muir et al. 2016;  
121 Ouyang et al. 2016). The functional significance of this interaction is supported by  
122 mutations in budding yeast Mcd1p that mimic the cohesion maintenance defects upon  
123 Pds5p depletion (Eng et al. 2014). However, crosslinking has shown human Pds5p  
124 interacts with all cohesin subunits, implying that its association with cohesin is more  
125 extensive and/or dynamic (Huis in t Veld et al. 2014; Hons et al. 2016). Furthermore, *in*  
126 *vivo* FRET suggested that Pds5p localizes near the hinge (Mc Intyre et al. 2007) and  
127 atomic force microscopy shows Smc1p/Smc3p dimer conformations in which the hinge  
128 and head regions are adjacent (Sakai et al. 2003). This proximity was supported by the  
129 observation that purified hinge domains are capable of binding to the head-associated  
130 Scc3p subunit of cohesin (Murayama and Uhlmann 2015). Scc3p binds to the head and  
131 also binds Pds5p. Taken together these biochemical results suggest that cohesion  
132 might be maintained by an unanticipated conformation of cohesin involving binding of  
133 the hinge to the head.

134 Given the evidence that Pds5p has interactions with both the head and hinge  
135 regions, it is unclear how Pds5p mediates cohesion maintenance and which Smc  
136 domains are involved. To begin to address these issues, we conducted a  
137 comprehensive RID screen of Smc3p, a transposon-based mutagenesis approach that

138 generates random 5 amino acid insertions. Here we characterize an insertion mutant  
139 located in the Smc3p hinge region. This mutant establishes cohesion but fails to  
140 maintain it, yet Pds5p remains bound to cohesin and to chromosomes. Previous work  
141 suggested that the Smc hinge region functions only in cohesion establishment (Gruber  
142 et al. 2006; Kurze et al. 2011). Our analysis reveals that the Smc3p hinge is important  
143 for cohesion maintenance.

144

## 145 **Results**

146

### 147 **The D667 region of the Smc3p hinge enhances but is not essential for cohesin** 148 **binding at centromeres and cohesin-associated regions**

149

150 We used a random insertion dominant (RID) screen to identify partial loss of  
151 function alleles of *SMC3* (Milutinovich et al. 2007; Eng et al. 2014). We expected to  
152 obtain RID screen mutations at the interfaces between Smc3p and Smc1p or Mcd1p.  
153 These mutations would be expected to prevent assembly and subsequent loading of  
154 cohesin onto chromosomes. In addition to assembly mutants, we predicted that  
155 mutations that preserved cohesin assembly would be found. We reasoned that if Smc3p  
156 function is modulated after cohesin assembles and binds chromosomes to maintain  
157 cohesion, mutants of Smc3p could be found that impair this step.

158 Mutant *SMC3* alleles were generated by *in vitro* transposon-mediated  
159 mutagenesis, which produced a library encoding random five-amino acid insertions  
160 (Supplemental Figure 1, Materials and Methods). In this library, *SMC3* was placed

161 under control of the conditional *pGAL 1* promoter. The library was transformed into both  
162 wild-type haploid yeast and the temperature-sensitive *smc3-42* strain. Transformants  
163 were obtained on dextrose-containing media to repress RID library *pGAL 1-SMC3*  
164 expression. Colonies were then screened for impaired growth on plates containing  
165 galactose as the carbon source to drive *pGAL 1*-mediated overexpression of mutant  
166 *SMC3* alleles. The location of insertions within *SMC3* that impaired growth of wild-type  
167 (Supplemental Table 1) or *smc3-42* cells (Supplemental Table 2) when overexpressed  
168 were then determined by sequencing.

169 In the course of mapping RID mutations, we found ten RIDs within the Smc3p  
170 hinge domain (Figure 1A). Dimerization of the Smc1p and Smc3p hinges forms a  
171 toroidal structure with two interfaces termed “North” and “South” (Mishra et al. 2010).  
172 Mutations that disrupt the hinge interfaces or that neutralize the positively charged  
173 amino acids in the central channel have been studied previously (Kurze et al. 2011).  
174 Our screen identified three RIDs that mapped to the North hinge interface while six  
175 mapped near the South interface. Of the six RIDs near the South interface, five were  
176 located at or immediately adjacent to conserved glycine amino acids known to be  
177 necessary for SMC hinge dimerization *in vitro* (Figure 1B) (Hirano et al. 2001). The sixth  
178 RID, encoding an insertion of five amino acids (AAAAD) following D667, maps to a  
179 hairpin loop extending from the top of a beta-sheet that contributes to the South hinge  
180 interface. We hypothesized that the unusual position of the D667 RID might reveal a  
181 novel function of the hinge in cohesin function.

182 The RID screen utilizes over-expression to generate a dominant phenotype. We  
183 wanted to determine whether *smc3-D667* could support viability when expressed at



184 native levels. For this purpose, we transformed a haploid strain bearing *SMC3-3V5-AID*  
185 as the sole *SMC3*, henceforth abbreviated *SMC3-AID*, with either an integrating *smc3-*  
186 *D667* or *SMC3* wild-type allele under native expression at the *LEU2* locus. We then  
187 compared growth of the *SMC3-AID* parent alone to derivatives containing either *smc3-*  
188 *D667* or wild-type *SMC3*. Strains were grown to stationary phase in YPD then plated as  
189 10-fold serial dilutions on YPD media alone or containing auxin. The auxin-inducible  
190 degron (AID) epitope on Smc3-AIDp allows its rapid and specific proteasome-mediated  
191 degradation when cells are treated with auxin (Nishimura et al. 2009). As expected, the  
192 *SMC3-AID* parent is unable to grow on auxin-containing media whereas the *SMC3* wild-  
193 type containing strain shows robust growth on auxin (Figure 1C). The *smc3-D667*  
194 containing cells failed to grow on media containing auxin. The fact that *smc3-D667*  
195 *SMC3-AID* cells grew well in the absence of auxin indicated that *smc3-D667* is  
196 recessive unless over-expressed. Thus, *smc3-D667p* was unable to support one or  
197 more essential cohesin functions.

198         The inviability of *smc3-D667* cells could be due to a failure of cohesin to bind DNA  
199 or a failure to perform an essential cohesin function after binding DNA. To distinguish  
200 between these possibilities, we first assessed whether *smc3-D667p* cohesin binds DNA.  
201 Strains containing *SMC3-AID* alone or also a second *SMC3*, either wild-type *SMC3* or  
202 *smc3-D667* were arrested in G1 phase, treated with auxin to deplete Smc3-AIDp. Cells  
203 were then synchronously released from G1 into YPD media containing auxin and  
204 nocodazole to re-arrest them in mid-M phase while maintaining Smc3-AIDp depletion  
205 (Figure 2A and Materials and Methods). To assess qualitatively whether *smc3-D667*  
206 supported binding of cohesin to chromosomes, we processed mid-M phase arrested cells

207 for chromosome spreads and assessed chromosomal binding of the cohesin subunit  
208 Mcd1p by immunofluorescence. Mcd1p is a marker for the cohesin complex since Mcd1p  
209 cannot bind chromosomes unless it is part of the four-subunit complex (Toth et al. 1999).  
210 As expected, robust Mcd1p signal was observed on chromosome spreads from cells with  
211 Smc3p (*SMC3 SMC3-AID*) but not from cells without it (*SMC3-AID*) (Figure 2B). In *smc3-*  
212 *D667 SMC3-AID* cells, Mcd1p bound to chromosomes at levels similar to wild-type cells.  
213 This result indicated that *smc3-D667p* supports both cohesin complex assembly and  
214 binding to chromosomes.

215 We used chromatin immunoprecipitation (ChIP) to assess whether the cohesin  
216 chromosomal binding observed via spreads reflected specific binding to CARs and  
217 centromeres. Mid-M phase cells prepared as described for chromosome spreads (Figure  
218 2A) were fixed and processed for ChIP (Figure 2A and Materials and Methods). Cohesin  
219 binding was assessed using anti-Mcd1p antibodies. As expected, Mcd1p binding to CARs  
220 and centromeres was robust in cells with Smc3p (*SMC3 SMC3-AID*) and absent in those  
221 without it (*SMC3-AID*) (Figure 2C). Mcd1p binding in *smc3-D667* cells was similar to wild-  
222 type at centromeres (Figure 2C, right) and at the pericentromeric *CARC1* peak (Figure  
223 2C, left), but somewhat reduced at centromere-distal *TRM1* and *CARL1* peaks (Figure  
224 2C, center and Supplemental Figure 2A). These results indicated that *smc3-D667p*  
225 cohesin localizes to CARs and centromeres. To corroborate further the DNA binding of  
226 *smc3-D667p*, we generated strains bearing Smc3p and *smc3-D667p* tagged with a 6HA  
227 epitope in the *SMC3-AID* background. Mid-M phase auxin-treated cells were prepared  
228 (Figure 2A) and the presence of *smc3-6HA-D667* and Smc3-6HAp were confirmed by  
229 Western blotting (Supplemental Figure 3). We then performed ChIP using anti-HA to

230 directly monitor the Smc3p cohesin subunit. As was observed in the Mcd1p ChIP, smc3-  
231 6HA-D667p (*smc3-6HA-D667 SMC3-AID*) bound to CARs and centromeres, albeit  
232 somewhat reduced compared to wild-type Smc3p (Figure 2D and Supplemental Figure  
233 2B). These data, using two different cohesin subunits, show that smc3-D667p cohesin  
234 complex binds to CARs and centromeres but at reduced levels compared to wild-type.

235

### 236 **The D667 region of the Smc3p hinge is required to maintain cohesion**

237 Smc3-D667p cohesin binds chromosomes, so we assayed whether it can perform  
238 cohesin's function of tethering sister chromatids. Therefore, we assessed sister chromatid  
239 cohesion at centromere-proximal (*TRP1*) or centromere-distal (*LYS4*) loci by integrating  
240 tandem LacO repeats in strains that express a GFP-LacI fusion (Figure 3A and Materials  
241 and Methods). Strains bearing *SMC3-AID* alone or also containing either wild-type *SMC3*  
242 or *smc3-D667* were arrested in G1, treated with auxin to degrade Smc3-AIDp then  
243 synchronously released from G1 into media containing auxin and nocodazole to allow  
244 progression through S phase and arrest in mid-M phase (Figure 2A). Nearly all G1 cells  
245 in all strains contained a single GFP focus, indicating no preexisting aneuploidy (Figure  
246 3B). As expected, only a small fraction of mid-M phase arrested cells with Smc3p (*SMC3*  
247 *SMC3-AID*) lost cohesion at *TRP1* or *LYS4*, whereas cells lacking Smc3p (*SMC3-AID*)  
248 had almost complete loss of cohesion. Nearly two-thirds of cells expressing only *smc3-*  
249 *D667* (*smc3-D667 SMC3-AID*) also had lost cohesion at these two loci. This result  
250 suggested that the D667 region of the hinge was required for either robust establishment  
251 and/or maintenance of cohesion.

252           These two possibilities can be distinguished by kinetic analysis of cohesion in  
253 populations of cells synchronously progressing through the cell cycle. Mutants that  
254 compromise cohesion establishment like those defective in core subunits of cohesin  
255 *MCD1*, *SMC3*, and *SMC1* exhibit sister chromatid separation immediately after DNA  
256 replication (Guacci et al. 1997; Michaelis et al. 1997). Mutants that compromise  
257 cohesion maintenance like those defective in the cohesin regulator *PDS5* also lose  
258 cohesion but significantly later in the cell cycle than establishment mutants (Tanaka et  
259 al. 2001; Stead et al. 2003; Noble et al. 2006; Eng et al. 2014). Using the same strains  
260 as described above along with a *PDS5-AID* strain, we assessed when cohesion was  
261 lost in *smc3-D667*. Strains were arrested in G1 and treated with auxin to degrade  
262 Smc3-AIDp, then released from G1 in the presence of auxin and nocodazole to allow  
263 cells to progress through S phase and arrest in mid-M. After release from G1, aliquots  
264 of cells were removed every fifteen minutes to assess DNA content and cohesion at  
265 *TRP1* and *LYS4* (Figure 3C).

266           From analysis of the DNA content, all strains exhibited nearly identical kinetics of  
267 progression through S phase and subsequent arrest in mid-M (Supplemental Figure  
268 4A). As expected for cells expressing Smc3p (*SMC3 SMC3-AID*), sister chromatids  
269 were paired through mid-M arrest so few cells with separated sisters were detected. In  
270 contrast, both strains lacking Smc3p (*SMC3-AID*) and Pds5p (*PDS5-AID*) lost cohesion.  
271 However, the cohesion loss in the *PDS5-AID* cells was delayed by about 20 minutes, as  
272 published previously (Eng et al. 2014). Cells expressing only *smc3-D667p* (*smc3-D667*  
273 *SMC3-AID*) resembled *PDS5-AID* cells, with delayed cohesion loss at the *LYS4* locus  
274 and a more pronounced delay in cohesion loss at the *TRP1* locus. This delay in

275 cohesion loss in cells with *smc3-D667p* demonstrated that *smc3-D667* cells, like Pds5p-  
276 deficient cells, could establish but not maintain cohesion. Thus, the D667 region of the  
277 Smc3p hinge is important specifically for efficient maintenance of cohesion at both  
278 *CEN*-proximal and *CEN*-distal loci.

279 Cohesin is required to recruit the maintenance factor Pds5p to chromosomes  
280 (Hartman et al. 2000; Panizza et al. 2000). Since cells expressing *smc3-D667p*  
281 displayed a cohesion maintenance defect identical to cells depleted of Pds5p, we tested  
282 whether *smc3-D667p* cohesin was able to recruit Pds5p to chromosomes. To address  
283 this possibility, we first analyzed whether *smc3-D667p* supported Pds5p binding to  
284 chromosomes by ChIP using a Pds5p antibody (Figure 3D and Supplemental Figure  
285 4B). The ratio of Pds5p bound to CARs and centromeres in cells with *smc3-D667p*  
286 (*smc3-D667 SMC3-AID*) to Smc3p was very similar to that seen for Mcd1p or *smc3-*  
287 *6HA-D667p*. These results indicate that cohesin with *smc3-D667p* can bind Pds5p and  
288 recruit it to chromosomes. The ability of Pds5p to bind cohesin with *smc3-D667p* was  
289 then tested by co-immunoprecipitation (Figure 3E). Cells expressing FLAG-tagged  
290 Scc3p and HA-tagged Smc3p or *smc3-D667p* were arrested in M-phase after auxin-  
291 mediated depletion of Smc3-AIDp. Scc3p was immunoprecipitated using anti-FLAG  
292 antibody and cohesin subunits detected in the precipitates by Western blot. As  
293 expected, no Pds5p was detected in the FLAG immunoprecipitate from cells lacking  
294 Smc3p or when Scc3p was untagged (first and second lanes), while Pds5p and Smc3-  
295 6HAp were detected in the immunoprecipitate from cells expressing Smc3-6HAp (third  
296 lane). Importantly, similar Pds5p levels were observed in the immunoprecipitate from

297 cells expressing smc3-D667-6HAp (fourth lane). Thus, smc3-D667p cohesin binds  
298 Pds5p and recruits it to DNA.

299

300 **The D667 region of the Smc3p hinge is not required for its stable binding to**  
301 **chromosomes**

302

303 Cohesin is known to convert from a DNA-bound, untethered state to a tethered  
304 state in S phase (Ünal et al. 2008; Ben-Shahar et al. 2008). We envisioned two models  
305 by which cohesion that had been established in S phase by smc3-D667p could fail to be  
306 maintained as cells progressed into M phase. In one model, cohesin reverts back to its  
307 untethered state without perturbing cohesin binding to DNA. Precedence for this  
308 phenotype comes from the cohesin mutant *mcd1-ROCC* which, like *smc3-D667*, is  
309 defective for cohesion maintenance (Eng et al. 2014). Alternatively, the smc3-D667p is  
310 less stably bound so dissociates from DNA. In this model, following cohesion  
311 establishment, cohesin dissociation from chromosomes could manifest as a cohesion  
312 maintenance defect. Detecting putative cohesin dissociation is difficult, because the  
313 Scc2p/Scc4p complex continues loading cohesin onto chromosomes in mid-M phase  
314 creating a pool of bound cohesin that does not contribute to cohesion (Lengronne et al.  
315 2006). Therefore, the Scc2p/Scc4p complex must be inactivated to allow detection of  
316 cohesin dissociation.

317 To distinguish between these two models, we examined the stability of smc3-  
318 6HA-D667p binding to DNA under conditions where additional loading was prevented  
319 by depletion of the cohesin loader subunit Scc2p. This loader depletion approach

320 revealed that in wild-type cells, cohesin (Mcd1p) binds stably at CARs but exhibits  
321 reduced stability at centromeres (Eng et al. 2014). Therefore, we replaced *SCC2* with  
322 *SCC2-3FLAG-AID* in *SMC3-AID* strains bearing either wild-type Smc3-6HAp or smc3-  
323 D667-6HAp. Cultures of these strains were grown to mid-log phase and arrested in mid-  
324 M phase by addition of nocodazole. Cultures were then split and either auxin or vehicle  
325 (DMSO) added, then incubated for one hour. The aliquot containing auxin will deplete  
326 both Scc2-3FLAG-AIDp and Smc3-3V5-AIDp. Samples were collected and either fixed  
327 for ChIP or processed for Western Blot analysis (Figure 4A). Depletion of Scc2-3FLAG-  
328 AIDp and Smc3-3V5-AIDp was confirmed by Western blot (Figure 4B).

329 ChIP of Smc3-6HAp showed no difference in binding to CAR peaks *TRM1* and  
330 *CARL1* after Scc2-3FLAG-AIDp depletion (Figure 4C, left). The persistence of high  
331 ChIP levels even after an hour indicated that cohesin remained very stably bound to  
332 DNA. Similarly, smc3-6HA-D667p ChIP at *TRM1* and *CARL1* peaks was unchanged by  
333 Scc2-3FLAG-AIDp depletion (Figure 4C, right). At centromeres, Smc3-6HAp shows  
334 somewhat reduced binding after Scc2-3FLAG-AIDp depletion, confirming this cohesin is  
335 less stably bound. Similarly, somewhat reduced binding of smc3-6HA-D667p to  
336 centromeres was observed. These results demonstrated that smc3-6HA-D667p was as  
337 stably bound to chromosomes as wild-type Smc3-6HAp. Importantly, our results  
338 indicated that in mid-M phase arrested *smc3-D667* cells, when most sister chromatid  
339 cohesion is lost (Figure 3), smc3-D667p cohesin is stably bound to chromosomes.  
340 Thus, the D667 region of the Smc3p hinge performs a function in maintaining cohesion  
341 other than ensuring stable binding to DNA.

342

343 **The D667 region of the Smc3p hinge modulates cohesion and supports viability**  
344 **by a mechanism independent of Eco1p-dependent acetylation**

345

346 Eco1p is necessary for establishing cohesion during S phase through its  
347 acetylation of Smc3p at lysines K112 and K113. Although cohesion establishment  
348 occurs during S phase, Smc3p acetylation remains until anaphase onset, suggesting it  
349 may be required to maintain cohesion (Beckouet et al. 2010). Since smc3-D667p  
350 supported cohesion establishment, we predicted that it would be acetylated by Eco1p.  
351 Therefore, we used an antibody that specifically recognizes acetylated Smc3p-K113 to  
352 test the acetylation of smc3-D667p in cells arrested in mid-M. Cells were arrested in  
353 mid-M after auxin depletion (Figure 5A). As expected, in cells depleted of Eco1-AIDp or  
354 Smc3-AIDp, no acetylated Smc3p was detected (Figure 5B). While wild-type Smc3p  
355 showed strong acetylation signal, acetylation signal for smc3-D667p was reduced. A  
356 reduction in acetylation signal was expected because cohesin was known to be  
357 acetylated only after binding to DNA and less cohesin with smc3-D667p was bound to  
358 DNA than wild-type cohesin (Figure 2). Direct comparison of acetylation levels is  
359 possible when signal from the acetylation-recognizing antibody is linear across the  
360 observed range. However, we found that signal from the acetylation antibody was non-  
361 linear (Supplementary Figure 5), making it possible that smc3-D667p acetylation levels  
362 were closer to Smc3p than Figure 5B suggested.

363 To assess whether the reduced amount of smc3-D667p acetylation was  
364 responsible for the cohesion maintenance defect, we first asked whether a change in  
365 acetylation levels correlated with the appearance of the cohesion defect. Reduced



366 *smc3-D667p* acetylation may have resulted from a failure to acetylate it in S phase or to  
367 maintain it after S phase. To distinguish between these possibilities, we  
368 immunoprecipitated *smc3-6HA-D667p* from cells progressing synchronously through S  
369 phase following release from G1 arrest (Figure 5C). As expected, wild-type *Smc3-6HAp*  
370 acetylation began to appear during S phase then increased and remained high through  
371 M phase arrest (Figure 5D). While acetylation of *smc3-6HA-D667p* was lower than WT  
372 in early S phase, it increased as cells progressed into M phase. Therefore, *smc3-D667*  
373 cells establish cohesion with low *smc3-D667p* acetylation levels but its failure to  
374 maintain cohesion is not due to a subsequent decrease in acetylation levels.

375 We further examined the correlation between *Smc3p* acetylation levels and  
376 cohesin function by asking whether low levels of *Smc3p* acetylation always led to loss of  
377 essential cohesin function. Temperature-sensitive *eco1* mutants (*eco1-203* and *eco1-1*)  
378 establish and maintain cohesion at permissive temperature yet *eco1-1* has greatly  
379 reduced acetylation (Toth et al. 1999; Rowland et al. 2009; Heidinger-Pauli et al. 2009).  
380 We therefore compared *Smc3p* acetylation levels of the *eco1-203* mutant grown at the  
381 permissive temperature 23°C to the *smc3-D667* mutant. The level of *Smc3p* acetylation  
382 in *eco1-203* cells was very similar to *smc3-D667* cells (Figure 5E). This result  
383 suggested that the level of *smc3-D667p* acetylation was sufficient to support cohesion  
384 function. However, we could not rule out that the acetylation level of *smc3-D667p* was  
385 below a critical threshold too subtle to distinguish by Western blot.

386 We sought additional support for the idea that the lower *smc3-D667p* acetylation  
387 level is not responsible for its mutant phenotype. For this purpose, we assayed the  
388 *smc3-D667* mutant in the *SMC1-D1164E* mutant background, as this *SMC1* allele

389 completely bypasses the need for Smc3p acetylation in both cohesion and viability  
390 (Çamdere et al. 2015; Elbatsh et al. 2016). In the presence of auxin, *smc3-D667 SMC3-*  
391 *AID* and *SMC1-D1164E smc3-D667 SMC3-AID* cells were inviable (Figure 6A).  
392 Therefore, the viability defect of *smc3-D667* is distinct from *eco1-ts* and deletion  
393 mutants, which are bypassed by *SMC1-D1164E*. We next asked whether *SMC1-*  
394 *D1164E* restored cohesion to *smc3-D667* cells as was observed for the *eco1Δ wpl1Δ*  
395 mutant and *eco1Δ* cells (Çamdere et al. 2015). As expected, *SMC1-D1164E* restored  
396 cohesion at the *LYS4* locus in the *eco1Δ wpl1Δ* mutant (Figure 6B and Çamdere et al.  
397 2015). However, *SMC1-D1164E* failed to restore cohesion to the *smc3-D667 SMC3-*  
398 *AID* mutant in the presence of auxin (Figure 6C). These results supported the idea that  
399 the viability and cohesion defects of *smc3-D667* cells were independent of reduced  
400 levels of Smc3p acetylation.

401

402 **The D667 region of the Smc3p hinge is required for *rDNA* condensation and**  
403 **viability even in the absence of antagonism by Wpl1p**

404

405 In addition to sister chromatid cohesion, cohesin and its regulators Pds5p and  
406 Eco1p are required for the proper mitotic condensation of chromatids in budding yeast  
407 (Guacci et al. 1997; Hartman et al. 2000; Skibbens et al. 1999). We addressed whether  
408 *smc3-D667* cells supported condensation by examining the morphology of the *rDNA*  
409 locus on chromosome XII. In chromosome spreads the *rDNA* is located on the periphery  
410 of the primary chromosome mass. In interphase, the *rDNA* can be seen as a diffuse  
411 puff while in M phase it condenses into a loop (Guacci et al. 1994). Chromosome

412 spreads of the *SMC3-AID* and *PDS5-AID* strains were prepared from cells arrested in  
413 mid-M phase (Figure 7A). The *rDNA* morphology was scored as either 1) tight, fully-  
414 condensed loop 2) wide, decondensed loop or 3) diffuse, with no apparent loop. In cells  
415 with wild-type Smc3p, the *rDNA* formed tight loops in almost all chromosome masses,  
416 indicative of chromosome condensation. In cells lacking Smc3p (*SMC3-AID*), the *rDNA*  
417 was almost always present as a diffuse mass, recapitulating the established role of  
418 Smc3p and cohesin in condensation. Cells expressing only *smc3-D667p* or depleted of  
419 Pds5p (*PDS5-AID*) exhibited very similar condensation defects and tight loops were  
420 rarely observed (Figure 7A). Thus, the D667 region of the Smc3p hinge is needed for  
421 two M phase functions of cohesin, the maintenance of cohesion and condensation.

422 We next asked whether the condensation defect and inviability of *smc3-D667*  
423 cells was due to antagonism by Wpl1p. Deletion of *WPL1* restores viability to *eco1*  
424 temperature-sensitive or *eco1* $\Delta$  strains which have impaired or absent acetylation  
425 (Rowland et al. 2009; Guacci and Koshland 2012). If the defect of *smc3-D667* can be  
426 attributed to a loss of Eco1p function, then *wpl1* $\Delta$  would restore condensation and  
427 viability to *smc3-D667* cells. To test this idea, we characterized the consequences of  
428 *WPL1* deletion in the *smc3-D667* strain. *wpl1* $\Delta$  failed to restore viability to *smc3-D667*  
429 *SMC3-AID* cells on media containing auxin (Figure 7B). Consistent with *smc3-D667*  
430 representing a defect distinct from cells lacking Smc3p acetylation, *wpl1* $\Delta$  failed to  
431 restore condensation of the *rDNA* or cohesion to *smc3-D667* cells (Figure 7C and 7D,  
432 respectively). Altogether, our observations confirmed that the critical defects in *smc3-*  
433 *D667* cells were independent of Smc3p acetylation or antagonism by Wpl1p.

434

435 **The D667 region is necessary for interallelic complementation**

436

437 Interallelic complementation between alleles of *SMC3* or *MCD1* revealed the  
438 ability of two separate cohesin complexes to share activities to restore cohesin  
439 functions. Additional evidence suggests that this communication between cohesins  
440 might reflect direct cohesin-cohesin interaction on chromosomes (Eng et al. 2015). We  
441 wondered whether the D667 region of the hinge was needed for cohesin-cohesin  
442 communication. To test this idea, we asked whether *smc3-D667* could partner with the  
443 temperature sensitive *smc3-42* allele to exhibit interallelic complementation. The  
444 temperature sensitive *smc3-42* strain cannot grow at its restrictive temperature of 34°C.  
445 Previously it had been shown that the *smc3-K113R* allele cannot support viability as the  
446 sole copy of *SMC3*. However, a strain in which both *smc3-K113R* and *smc3-42* alleles  
447 are present exhibits robust growth at 34°C, a condition in which neither single mutant  
448 can grow (a summary of complementation relationships is provided in Figure 8B). With  
449 this knowledge, we asked whether *smc3-D667* could substitute for *smc3-K113R* and  
450 complement *smc3-42*. As a metric for the extent of interallelic complementation, we  
451 repeated the previous experiment with *smc3-42* and *smc3-K113*. As expected, at 34°C  
452 neither *smc3-42* nor *smc3-K113R* single mutants were viable, while the *smc3-42 smc3-*  
453 *K113R* double mutant showed robust growth similar to wild-type (Figure 8A). As  
454 expected, the *smc3-D667* single mutant failed to grow. The double *smc3-42 smc3-D667*  
455 mutant resembled the growth of *smc3-42* alone. Thus, the property of interallelic  
456 complementation observed between *smc3-42* and *smc3-K113R* was not observed  
457 between *smc3-42* and *smc3-D667*. Therefore, *smc3-D667* lacks the activity necessary

458 for interallelic complementation. This result suggested that the D667 region of the hinge  
459 is necessary for cohesin-cohesin communication.

460

## 461 **Discussion**

462

463 Cohesin has a complex architecture with a heterodimeric ATPase domain and a  
464 hinge domain connected by a long coiled coil. The roles of these domains in cohesin's  
465 activity on chromosomes is poorly understood. Here, we identified and characterized  
466 *smc3-D667*, a mutant in the Smc3p hinge domain which blocks cohesin function in M  
467 phase. Kinetic analyses of cohesion during the cell cycle reveal that this mutation allows  
468 cohesion establishment but impairs subsequent maintenance of cohesion. We also  
469 show that this mutation impairs mitotic chromosome condensation of the *rDNA*.  
470 However, this mutation does not perturb the stable association of cohesin with  
471 chromosomes as measured by the persistence of this association even after loader  
472 inactivation. Together, our results support a function of cohesin's hinge domain in  
473 cohesion maintenance and condensation independent of cohesin's stable binding to  
474 chromosomes.

475 The cohesion maintenance and condensation functions of the hinge domain  
476 revealed by *smc3-D667* have not been reported previously. Two mutations that impact  
477 the North and South interfaces of the hinge dimer revealed a role of the hinge in  
478 cohesin binding to chromosomes, as expected given the role of the hinge dimer in  
479 maintaining the topological integrity of cohesin (Mishra et al. 2010). The novel  
480 phenotypes of *smc3-D667* are consistent with D667 localization, determined by

481 alignment to Smc3p homologs, within a loop not expected to impact the dimer interface.  
482 One study designed a cluster of mutations in *SMC1* and *SMC3* that neutralize the  
483 positive charges in a central channel formed by hinge dimerization (Kurze et al. 2011).  
484 This cluster of mutations (charge neutralization alleles) caused defects in cohesion and  
485 Smc3p acetylation but did not impair stable binding of cohesin to chromosomes, all  
486 phenotypes similar to the *smc3-D667* allele. However, unlike our study of *smc3-D667*,  
487 the charge neutralization alleles were not analyzed for establishment and maintenance  
488 cohesion, the functional significance of the reduced Smc3p acetylation, or  
489 condensation. If these alleles had the same cohesion and condensation defects as the  
490 *smc3-D667* allele, as we predict, these results would imply that changes to two distinct  
491 regions of the hinge dimer contribute to a common function needed for cohesion  
492 maintenance and condensation. The potential cooperation of the D667 region of the  
493 Smc3p hinge and the hinge channel could reflect a previously unrecognized  
494 conformational change of the hinge dimer needed for cohesin function. Indeed, in  
495 addition to the strict toroidal structures seen by crystallization of the cohesin or *TmSMC*  
496 hinge dimers, a recently published structure of the related *GsSMC* hinge dimer revealed  
497 that hinge dimers may adopt an asymmetric, relaxed conformation resembling a spring  
498 washer (Haering et al. 2002; Kurze et al. 2011; Kamada et al. 2017). Surprisingly, while  
499 both hinge interfaces remained intact in this structure, the relaxed face of the *GsSMC*  
500 hinge dimer involved a break in the beta sheet connected by a loop homologous to the  
501 D667 loop of Smc3p. Together with our results, further investigation of hinge structural  
502 flexibility on conformations and functions of cohesin seem worthwhile.

503           The unusual phenotypes of *smc3-D667* are also strikingly similar to those  
504 described for Pds5p depletion and *mcd1* alleles (Chan et al. 2013, Eng et al. 2014).  
505 They all allow stable cohesin binding to DNA but cause defects in cohesin  
506 maintenance and condensation. These common phenotypes suggest that the hinge,  
507 Pds5p and Mcd1p cooperate in a common molecular function. Indeed, this common  
508 function provides a biological explanation for in vivo FRET studies that suggest the  
509 formation of a complex involving the head, hinge, and Pds5p (Mc Intyre et al. 2007),  
510 and recent biochemical experiments that detected a supramolecular complex between  
511 the *S. pombe* hinge dimer and Psc3p (Scc3p ortholog) which binds to the head-  
512 associated Rad21p (Mcd1p ortholog) and Pds5p. Altogether these biochemical results  
513 along with our study support the idea that the hinge, Mcd1p, and Pds5p cooperate in a  
514 structural conformation required to promote cohesin maintenance and condensation.

515           Potential insight into the molecular function of this complex conformation comes  
516 from several additional observations. One possibility was the protection of Eco1p  
517 acetylation of Smc3p. Here, we show that while the level of *smc3-D667* acetylation is  
518 lower than wild-type, it is equal to that of the *eco1-203* mutant at its permissive  
519 temperature, which supports both viability and sister chromatid cohesion. Furthermore,  
520 we show that *SMC1-D1164E* and *wp1Δ*, two different mutations previously shown to  
521 bypass the absence of Eco1p acetylation in viability, cohesion (only *smc1-D1164E*) and  
522 condensation (only *wp1Δ*) are unable to restore these functions to the *smc3-D667*  
523 mutant. Finally, while Pds5p depletion also shows reduced Smc3p acetylation, the  
524 *mcd1-ROCC* allele does not (Chan et al. 2013; Robison, unpublished), again separating

525 the function of this complex conformation in cohesion maintenance from additional  
526 functions it may have in promoting acetylation.

527         A second possibility stems from our observation that the D667 region of the  
528 hinge is necessary for the communication between cohesin complexes as revealed by  
529 interallelic complementation. We showed that *smc3-D667* was unable to complement  
530 the inviability of *smc3-42* in *trans*. We previously showed viability of *smc3-42* could be  
531 complemented by chromosome bound *smc3-K113R*. Furthermore, the interallelic  
532 complementation for viability reflected restoration of all cohesin's biological functions  
533 and restoration of *smc3-42p* binding to DNA (Eng et al. 2015). Similar phenotypic and  
534 molecular interallelic complementation for *mcd1* alleles was also observed (Eng et al.  
535 2015). These observations led us to suggest that interallelic complementation of  
536 cohesin mutants reflected cohesin communication likely by the physical interaction  
537 between cohesin complexes. The importance of SMC complex oligomerization in their  
538 function is gaining traction. The inability of *smc3-D667* to complement *smc3-42* is  
539 consistent with the idea that the D667 region of the hinge is necessary for the physical  
540 interaction between cohesins and this physical interaction is necessary for maintaining  
541 cohesion and condensation.

542         We propose a working model in which cohesin oligomerizes by forming inverted  
543 dimers such that the hinge of one cohesin binds to the head of the other cohesin  
544 possibly through binding to *Scs3p* and that this hinge-head interaction is stabilized by  
545 *Pds5p*. As suggested previously, we can imagine two ways in which hinge-dependent  
546 oligomerization might be critical for maintenance of tethering (Eng et al. 2015). We  
547 previously showed that mere binding of cohesin to DNA is insufficient to generate



548 tethering, implying that tethering requires an additional activity (Eng et al. 2014). In one  
549 model (intramolecular handcuff), two DNA binding activities reside in the same cohesin.  
550 In this case oligomerization may inhibit (possibly by physical occlusion) factors that  
551 destabilize one of these binding activities. In a second model (intermolecular handcuff)  
552 tethering is achieved directly by hinge-dependent oligomerization of two cohesins each  
553 of which has a single DNA binding activity. Resolving these models awaits direct  
554 biochemical assays for cohesin oligomerization.

555

## 556 **Acknowledgements**

557

558 We thank Thomas Eng for helpful experimental guidance and the entire Koshland lab  
559 for fruitful discussions and reagents. The yeast Smc3-K113 acetylation antibody was a  
560 kind gift of Katsuhiko Shirahige. We also thank Benjamin Rowland and Ahmed Elbatsh  
561 for advice using the Smc3-K113 acetylation antibody.

562

563

564

565

566

567

568

569

570

571 **Materials and Methods**

572

573 Random insertion screen of *SMC3*

574

575 Plasmid pBR25 containing *pGAL-SMC3 URA3 ARS/CEN* was subject to *in vitro*

576 transposition according to the protocol recommended by the MuA transposase MGS Kit

577 (ThermoFisher Cat. F701). After transforming into TOP10 cells (Thermo), 5,756 AmpR

578 KanR colonies were pooled and plasmids harvested by Midi Prep (Qiagen). The pooled

579 library was digested with NotI to excise the KanR marker, gel extracted, and religated.

580 Ligation products were transformed once again into TOP10 cells and confirmed to have

581 lost KanR by replica plating. >30,000 colonies were pooled, and plasmids harvested by

582 Midi Prep to obtain a library of *pGAL-SMC3* plasmids with fifteen extra nucleotides

583 randomly inserted. Library depth was calculated by multiplying the fraction of pBR25

584 coding for *SMC3* (3,693 bp of 10,083 bp total) by the number of AmpR KanR colonies

585 (5,756) to obtain 2,118 plasmids expected to have an insertion in *SMC3*. From this

586 calculation, we expect plasmids represented in the library harboring insertions every

587 approximately 1.7 base pairs along *SMC3*. The library was transformed into wild-type

588 (3349-1B) and *smc3-42* (3358-3B) strains which were incubated at 23°C for three days

589 to select for transformants on synthetic complete media lacking uracil (SC –URA) with

590 2% dextrose supplied as the carbon source. 3,382 wild-type colonies and 1,811 *smc-42*

591 colonies were screened. Transformation colonies were replica plated onto SC –URA 2%

592 galactose plates and SC –URA 2% dextrose plates as a control and incubated overnight

593 at 23°C. Colonies that were slow growing or inviable on galactose plates were then

594 grown overnight in liquid YPD and plated in 10-fold serial dilutions on 1) galactose  
595 plates to confirm slow growth and 2) 5-FOA plates with 2% galactose to confirm linkage  
596 of slow growth to presence of the RID library plasmid. Insertion mutations were  
597 identified by PCR and sequencing across the entire *SMC3* ORF.

598

599 Yeast strains, media, and growth

600

601 All strains used are in the A364A background and their genotypes can be found in the  
602 Strain List. Yeast extract/peptone/dextrose media and synthetic dropout media was  
603 prepared as previously described (Guacci et al. 1997). Conditional AID degron strains  
604 were grown in YPD and auxin (3-indoleacetic acid, Sigma Aldrich Cat I3750) added to a  
605 final concentration of 0.75 mM to deplete AID-tagged proteins. YPD agar plates  
606 supplemented with auxin were made by cooling molten YPD 2% agar to 55°C prior to  
607 addition of auxin.

608

609 Cohesion assays

610

611 Sister chromatid cohesion was assessed at either the centromere-distal *LYS4* locus or  
612 centromere-proximal *TRP1* locus on chromosome IV in which *LacO* arrays had been  
613 integrated. The *GFP-LacI* fusion allele integrated at *HIS3* allows fluorescence  
614 microscopic visualization of *LacO* arrays. Cohesion was scored by growing cells to mid-  
615 log phase (OD<sub>600</sub> ~0.3) and arresting them in G1 using alpha factor at 10<sup>-8</sup> M (Sigma  
616 Aldrich). After arresting for 3 hours, auxin was added to a final concentration of 0.75 mM

617 to deplete Smc3-AIDp for one hour. Cells were released from G1 arrest by washing in  
618 YPD containing auxin and 0.1 mg/mL Pronase E (Sigma Aldrich) five times and  
619 resuspending in YPD containing auxin and 15 µg/mL nocodazole (Sigma Aldrich).  
620 Cultures were incubated at 23°C and samples fixed either 1) periodically for assessing  
621 S-phase cohesion establishment or 2) after three hours in which >95% of cells had  
622 arrested in G2/M. In addition to fixation for microscopy, samples were taken in parallel  
623 to assess DNA content by flow cytometry. Cohesion was scored by counting the  
624 number of GFP-LacI foci in the nucleus by fluorescence microscopy of fixed cells.

625

626 Monitoring condensation at the *rDNA* locus

627

628 Cells were grown as if for assessing cohesion by arresting in YPD containing auxin and  
629 nocodazole following release from G1. Cells were fixed, spheroplasted, and lysed to  
630 allow binding of chromosomes to slides as described previously (Guacci et al. 1994).  
631 Briefly, 1 mL of mid-M phase arrested cells were fixed two hours in 100 µL of 37%  
632 formaldehyde, washed twice in water, and spheroplasted for one hour. Triton X-100  
633 was added to 0.5% for 5 minutes, then cells were pelleted and resuspended in water.  
634 Cells were then added to poly-lysine-coated slides for ten minutes. 0.5% SDS was  
635 added for 10 minutes to solubilize membranes and release DNA masses then removed.  
636 Slides were fixed in 3:1 methanol:acetic acid for five minutes and allowed to dry. Cells  
637 on slides were treated with RNase A and Proteinase K and subject to a series of short  
638 70%, 80%, 90%, and 100% ethanol washes. After drying, DNA masses were visualized  
639 with DAPI and *rDNA* morphology scored.

640

641 Chromatin immunoprecipitation (ChIP)

642

643 Cells were grown as if for assessing cohesion by arresting at mid-M phase in YPD  
644 containing auxin and nocodazole following release from G1 arrest. ChIP was performed  
645 as described previously (Eng et al. 2014; Wahba et al. 2013) except that chromatin  
646 shearing was performed on a Bioruptor Pico machine (Diagenode, Denville, NJ) for 5  
647 minutes (30 sec on/off cycling). Immunoprecipitation was performed using monoclonal  
648 Mouse anti-HA (Roche), monoclonal Mouse anti-V5 (ThermoFisher), polyclonal Rabbit  
649 anti-Pds5p (Covance Biosciences, Princeton, NJ), or polyclonal Rabbit anti-Mcd1p  
650 (Covance) antibodies. A no antibody control was always included to assess specificity  
651 of chromatin recovery.

652

653 Detection of Smc3-K113 acetylation by Western blotting

654

655 Cells were grown to  $OD_{600}=0.5$  in YPD at 23°C before addition of auxin to 0.75 mM and  
656 incubation for 1 hour. Nocodazole was added to a final concentration of 15  $\mu\text{g}/\text{mL}$  to  
657 arrest cells in mid-M phase. Cells were pelleted and resuspended in lysis buffer  
658 consisting of 25 mM HEPES pH 8.0, 2 mM  $\text{MgCl}_2$ , 100  $\mu\text{M}$  EDTA, 500  $\mu\text{M}$  EGTA, 1%  
659 NP-40, 150 mM KCl, 15% glycerol, Complete-Mini EDTA-free protease inhibitor cocktail  
660 (Roche), 10 mM sodium butyrate, and 20 mM beta-glycerophosphate. Cells were  
661 incubated in buffer for 30 minutes on ice, then glass beads were added to a 1:1 volume  
662 ratio before bead-beating for three minutes. Lysates were pelleted at 14K for 10 minutes

663 at 4°C, and protein concentration measured using Coomassie Brilliant Blue. Lysates  
664 were boiled in 120 mM HEPES pH 7.0 containing 1% SDS at 95°C for five minutes, then  
665 diluted 1:1 in 2X Laemmli sample buffer. Smc3-K113 acetylation was detected by  
666 blotting with monoclonal Mouse antibody (a gift from K. Shirahige) at a concentration of  
667 1:1,000 in 5% milk-PBST.

668

669 Chromosome spreads and microscopy

670

671 Cells were grown as if for assessing cohesion by arresting in mid-M phase in YPD  
672 containing auxin and nocodazole following release from G1 arrest. Chromosome  
673 spreads were prepared as described previously (Wahba et al. 2013). Slides were  
674 incubated with 1:5,000 rabbit polyclonal anti-Mcd1p and 1:5,000 mouse anti-V5  
675 antibody (Life Technologies). Antibodies were diluted in blocking buffer (5% BSA, 0.2%  
676 milk, 1X PBS, 0.2% Triton X-100). Secondary Alexa Fluor 488-conjugated chicken anti-  
677 mouse and Alexa Fluor 568-conjugated donkey anti-rabbit (ThermoFisher Cats.  
678 A21200 and A10042) antibodies were diluted 1:5,000 in blocking buffer. Indirect  
679 immunofluorescence was detected on an Axioplan2 microscope (Zeiss, Thornwood,  
680 NY) using the 100X objective (numerical aperture 1.40) which is equipped with a  
681 Quantix charge-coupled camera (Photometrics).

682

683

684

685

686 **Strain List**

| <b>Strain</b> | <b>Genotype</b>                                                                                                                                                                                      | <b>Reference</b> |
|---------------|------------------------------------------------------------------------------------------------------------------------------------------------------------------------------------------------------|------------------|
| BRY467        | <i>MATa smc3-D667-LEU2:leu2-3,112 smc3Δ::HPH lys4::LacO(DK)-NAT bar1 pHIS3-GFPLacl-TRP1:his3-11,15 trp1-1 ura3-52 + pEU42 (SMC3 CEN URA3)</i>                                                        | this study       |
| BRY474        | <i>MATa SMC3-LEU2:leu2-3,112 SMC3-3V5-AID<sup>608</sup> trp1Δ::OsTIR1-CaTRP1 lys4::LacO(DK)-NAT pHIS3-GFPLacl-HIS3:his3-11,15 ura3-52 bar1</i>                                                       | this study       |
| BRY482        | <i>MATa smc3-D667-LEU2:leu2-3,112 SMC3-3V5-AID<sup>608</sup> trp1Δ::OsTIR1-CaTRP1 lys4::LacO(DK)-NAT pHIS3-GFPLacl-HIS3:his3-11,15 ura3-52 bar1</i>                                                  | this study       |
| BRY602        | <i>MATa smc3-6HA<sup>608</sup>-D667-URA3:ura3-52 SMC3-3V5-AID<sup>608</sup> trp1Δ::OsTIR1-CaTRP1 lys4::LacO(DK)-NAT leu2-3,112 pHIS3-GFPLacl-HIS3:his3-11,15 bar1</i>                                | this study       |
| BRY604        | <i>MATa SMC3-6HA<sup>608</sup>-URA3:ura3-52 SMC3-3V5-AID<sup>608</sup> trp1Δ::OsTIR1-CaTRP1 lys4::LacO(DK)-NAT leu2-3,112 pHIS3-GFPLacl-HIS3:his3-11,15 bar1</i>                                     | this study       |
| BRY607        | <i>MATa SCC3-3FLAG<sup>1089</sup>-LEU2:leu2-3,112 SMC3-3V5-AID<sup>608</sup> trp1Δ::OsTIR1-CaTRP1 lys4::LacO(DK)-NAT pHIS3-GFPLacl-HIS3:his3-11,15 leu2-3,112 ura3-52 bar1</i>                       | this study       |
| BRY621        | <i>MATa SCC3-3FLAG<sup>1089</sup>-LEU2:leu2-3,112 SMC3-6HA<sup>608</sup>-URA3:ura3-52 SMC3-3V5-AID<sup>608</sup> trp1Δ::OsTIR1-CaTRP1 lys4::LacO(DK)-NAT pHIS3-GFPLacl-HIS3:his3-11,15 bar1</i>      | this study       |
| BRY625        | <i>MATa SCC3-3FLAG<sup>1089</sup>-LEU2:leu2-3,112 smc3-6HA<sup>608</sup>-D667-URA3:ura3-52 SMC3-3V5-AID<sup>608</sup> trp1Δ::OsTIR1-CaTRP1 lys4::LacO(DK)-NAT pHIS3-GFPLacl-HIS3:his3-11,15 bar1</i> | this study       |

|        |                                                                                                                                                                                 |                    |
|--------|---------------------------------------------------------------------------------------------------------------------------------------------------------------------------------|--------------------|
| BRY647 | <i>MATa</i> SMC3-LEU2: <i>leu2-3,112 smc3Δ::HPH rad61Δ::G418 lys4::LacO(DK)-NAT ura3-52 bar1</i><br><i>pHIS3-GFPLacl-TRP1:his3-11,15 trp1-1 + pEU42 (SMC3 CEN URA3)</i>         | this study         |
| BRY648 | <i>MATa</i> SMC3(D1189H)-LEU2: <i>leu2-3,112 smc3Δ::HPH rad61Δ::G418 lys4::LacO(DK)-NAT ura3-52 bar1</i><br><i>pHIS3-GFPLacl-TRP1:his3-11,15 trp1-1 + pEU42 (SMC3 CEN URA3)</i> | Guacci et al. 2015 |
| BRY649 | <i>MATa smc3-D667-LEU2:leu2-3,112 smc3Δ::HPH rad61Δ::G418 lys4::LacO(DK)-NAT ura3-52 bar1</i><br><i>pHIS3-GFPLacl-TRP1:his3-11,15 trp1-1 + pEU42 (SMC3 CEN URA3)</i>            | this study         |
| BRY650 | <i>MATa smc3-D667-D1189H-LEU2:leu2-3,112 smc3Δ::HPH rad61Δ::G418 lys4::LacO(DK)-NAT ura3-52 bar1</i><br><i>pHIS3-GFPLacl-TRP1:his3-11,15 trp1-1 + pEU42 (SMC3 CEN URA3)</i>     | this study         |
| BRY676 | <i>MATa</i> SMC3-3V5-AID <sup>608</sup> <i>trp1Δ::OsTIR1-CaTRP1</i><br><i>LacO(DK)-NAT:10kb-CEN4 pHIS3-GFPLacl-HIS3:his3-11,15 ura3-52 leu2-3,112 bar1</i>                      | this study         |
| BRY678 | <i>MATa</i> SMC3-LEU2: <i>leu2-3,112 SMC3-3V5-AID<sup>608</sup> trp1Δ::OsTIR1-CaTRP1</i><br><i>LacO(DK)-NAT:10kb-CEN4 pHIS3-GFPLacl-HIS3:his3-11,15 ura3-52 bar1</i>            | this study         |
| BRY680 | <i>MATa smc3-D667-LEU2:leu2-3,112 SMC3-3V5-AID<sup>608</sup> trp1Δ::OsTIR1-CaTRP1</i><br><i>LacO(DK)-NAT:10kb-CEN4 pHIS3-GFPLacl-HIS3:his3-11,15 ura3-52 bar1</i>               | this study         |
| BRY714 | <i>MATa rad61Δ::HPHMX SMC3-3V5-AID<sup>608</sup> trp1Δ::OsTIR1-CaTRP1</i><br><i>lys4::LacO(DK)-NAT leu2-3,112 pHIS3-GFPLacl-HIS3:his3-11,15 ura3-52 bar1</i>                    | this study         |
| BRY716 | <i>MATa rad61Δ::HPHMX SMC3-LEU2:leu2-3,112 SMC3-3V5-AID<sup>608</sup> trp1Δ::OsTIR1-CaTRP1</i><br><i>lys4::LacO(DK)-NAT pHIS3-GFPLacl-HIS3:his3-11,15 ura3-52 bar1</i>          | this study         |



|        |                                                                                                                                                                                                         |            |
|--------|---------------------------------------------------------------------------------------------------------------------------------------------------------------------------------------------------------|------------|
| BRY718 | <i>MATa rad61Δ::HPHMX smc3-D667-LEU2::leu2-3,112 SMC3-3V5-AID<sup>608</sup> trp1Δ::OsTIR1-CaTRP1</i><br><i>lys4::LacO(DK)-NAT pHIS3-GFPLacl-HIS3:his3-11,15</i><br><i>ura3-52 bar1</i>                  | this study |
| BRY720 | <i>MATa smc1-D1164E SMC3-3V5-AID<sup>608</sup> trp1Δ::OsTIR1-CaTRP1</i><br><i>lys4::LacO(DK)-NAT leu2-3,112</i><br><i>pHIS3-GFPLacl-HIS3:his3-11,15</i><br><i>ura3-52 bar1</i>                          | this study |
| BRY721 | <i>MATa CDC20-3V5-AID2-KANMX smc3-D667-LEU2::leu2-3,112 SMC3-3V5-AID<sup>608</sup></i><br><i>trp1Δ::OsTIR1-CaTRP1 lys4::LacO(DK)-NAT</i><br><i>pHIS3-GFPLacl-HIS3:his3-11,15</i><br><i>ura3-52 bar1</i> | this study |
| BRY723 | <i>MATa CDC20-3V5-AID2-KANMX SMC3-3V5-AID<sup>608</sup> trp1Δ::OsTIR1-CaTRP1</i><br><i>lys4::LacO(DK)-NAT leu2-3,112</i><br><i>pHIS3-GFPLacl-HIS3:his3-11,15</i><br><i>ura3-52 bar1</i>                 | this study |
| BRY724 | <i>MATa CDC20-3V5-AID2-KANMX SMC3-LEU2::leu2-3,112 SMC3-3V5-AID<sup>608</sup></i><br><i>trp1Δ::OsTIR1-CaTRP1</i><br><i>lys4::LacO(DK)-NAT pHIS3-GFPLacl-HIS3:his3-11,15</i><br><i>ura3-52 bar1</i>      | this study |
| BRY756 | <i>MATa smc3-D667-LEU2::leu2-3,112 smc3-42</i><br><i>lys4::LacO(DK)-NAT trp1-1 pHIS3-GFPLacl-HIS3:his3-11,15 bar1</i><br><i>ura3-52 + pEU42 (SMC3 CEN URA3)</i>                                         | this study |
| BRY815 | <i>MATa PDS5-3V5-AID2:KanMx6 LacO(DK)-NAT:10kb-CEN4 pHIS3-GFP-Lacl-HIS3::his3-11,15 trp1-1</i><br><i>leu2-3,112 bar1 GAL+ ADH1-OsTIR1-URA3::ura3-52</i>                                                 | this study |
| BRY832 | <i>MATa smc1-D1164E SMC3-LEU2::leu2-3,112 SMC3-3V5-AID<sup>608</sup> trp1Δ::OsTIR1-CaTRP1</i><br><i>lys4::LacO(DK)-NAT pHIS3-GFPLacl-HIS3:his3-11,15</i><br><i>ura3-52 bar1</i>                         | this study |
| BRY833 | <i>MATa SMC1-D1164E smc3-D667-LEU2::leu2-3,112 SMC3-3V5-AID<sup>608</sup> trp1Δ::OsTIR1-CaTRP1</i><br><i>lys4::LacO(DK)-NAT pHIS3-GFPLacl-HIS3:his3-11,15</i><br><i>ura3-52 bar1</i>                    | this study |

|           |                                                                                                                                                                                                            |                          |
|-----------|------------------------------------------------------------------------------------------------------------------------------------------------------------------------------------------------------------|--------------------------|
| BRY840    | <i>MATa</i> SCC2-3FLAG-AID2-HPHMX SMC3-N607-6HA-URA3: <i>ura3-52</i> SMC3-3V5-AID <sup>608</sup> <i>trp1Δ::OsTIR1-CaTRP1 lys4::LacO(DK)-NAT leu2-3,112 pHIS3-GFPLacl-HIS3:his3-11,15 bar1</i>              | this study               |
| BRY842    | <i>MATa</i> SCC2-3FLAG-AID2-HPHMX <i>smc3-6HA<sup>608</sup>-D667-URA3:ura3-52</i> SMC3-3V5-AID <sup>608</sup> <i>trp1Δ::OsTIR1-CaTRP1 lys4::LacO(DK)-NAT leu2-3,112 pHIS3-GFPLacl-HIS3:his3-11,15 bar1</i> | this study               |
| DK5535    | <i>MATa</i> <i>mcd1-Q266-3FLAG-URA3::ura3-52</i> MCD1-AID-KANMX <i>pGPD1-OsTIR1-LEU2::leu2-3,112 lys4::LacO(DK)-NAT trp1-1 GFPLacl-HIS3:his3-11,15 bar1</i>                                                | Eng et al. 2014          |
| DK5542    | <i>MATa</i> MCD1-AID-KANMX6 ADH1-OsTIR1-URA3: <i>ura3-52</i> <i>lys4::LacO(DK)-NAT trp1-1 GFPLacl-HIS3:his3-11,15 bar1 leu2-3,112</i>                                                                      | Eng et al. 2014          |
| DK5561    | <i>MATa</i> <i>rad61Δ::HPHMX pADH1-TIR1-URA3::ura3-42 lys4::LacO(DK)-NAT trp1-1 GFPLacl-HIS3:his3-11,15 bar1 leu2-3,112</i>                                                                                | Eng et al. 2014          |
| TE228     | <i>MATa</i> PDS5-3V5-AID2-KANMX6 <i>lys4::LacO(DK)-NAT pHIS3-GFP-Lacl-HIS3:his3-11,15 trp1-1 ura3-52</i>                                                                                                   | Eng et al. 2014          |
| TE576     | <i>MATa</i> <i>smc3-42 lys4::LacO(DK)-NAT pHIS3-GFP-Lacl-HIS3:his3-11,15 leu2-3,112 bar1 trp1-1 + pEU42 (SMC3 CEN URA3)</i>                                                                                | Eng et al. 2015          |
| TE578     | <i>MATa</i> <i>smc3-42 smc3-K113R-LEU2::leu2-3,112 lys4::LacO(DK)-NAT pHIS3-GFP-Lacl-HIS3:his3-11,15 leu2-3,112 bar1 trp1-1 + pEU42 (SMC3 CEN URA3)</i>                                                    | Eng et al. 2015          |
| VG3349-1B | <i>MATa</i> <i>lys4::LacO(DK)-NAT trp1-1 GFPLacl-HIS3:his3-11,15 bar1 leu2-3,112 ura3-52</i>                                                                                                               | Guacci and Koshland 2012 |
| VG3358-3B | <i>MATa</i> <i>smc3-42 lys4::LacO(DK)-NAT trp1-1 pHIS3-GFP-LACL-HIS3:his3-11,15 bar1 leu2-3,112 ura3-52</i>                                                                                                | Guacci and Koshland 2012 |

|              |                                                                                                                                                                    |                          |
|--------------|--------------------------------------------------------------------------------------------------------------------------------------------------------------------|--------------------------|
| VG3464-16C   | <i>MATa smc3Δ::HPH lys4::LacO(DK)-NAT bar1 pHIS3-GFPLacl-TRP1:his3-11,15 trp1-1 leu2-3,112 ura3-52 +pEU42 (SMC3 CEN URA3)</i>                                      | Guacci and Koshland 2012 |
| VG3486       | <i>MATa smc3Δ::HPH lys4::LacO(DK)-NAT bar1 pHIS3-GFPLacl-TRP1:his3-11,15 trp1-1 leu2-3,112 ura3-52 +pEU42 (SMC3 CEN URA3) + pEU41 (SMC3 CEN LEU2)</i>              | Eng et al. 2015          |
| VG3486-K113R | <i>MATa smc3Δ::HPH lys4::LacO(DK)-NAT bar1 pHIS3-GFPLacl-TRP1:his3-11,15 trp1-1 leu2-3,112 ura3-52 + pEU42 (SMC3 URA3 CEN) + pEU41-K113R (smc3-K113R LEU2 CEN)</i> | Eng et al. 2015          |
| VG3503-4A    | <i>MATa rad61Δ::HPHMX eco1Δ::KANMX trp1-1 lys4::LacO(DK)-NAT leu2-3,112 pHIS3-GFPLacl-HIS3:his3-11,15 ura3-52 bar1</i>                                             | Çamdere et al. 2015      |
| VG3506-5D    | <i>MATa eco1-203 LacO-NAT:10kb-CEN4 trp1-1 pHIS3-GFPLacl-HIS3:his3-11,15 leu2-3,112 ura3-52 bar1</i>                                                               | this study               |
| VG3575-2C    | <i>MATa smc1-D1164E rad61Δ::HPHMX eco1Δ::G418 lys4::LacO(DK)-NAT GFPLacl-HIS3:his3-11,15 trp1-1 leu2-3,112 ura3-52 bar1</i>                                        | Çamdere et al. 2015      |
| VG3578-1A    | <i>MATa smc3Δ::HPHMX rad61Δ::KANMX leu2-3,112 lys4::LacO(DK)-NAT ura3-52 bar1 pHIS3-GFPLacl-TRP1:his3-11,15 trp1-1 + pEU42 (SMC3 CEN URA3)</i>                     | Guacci et al. 2015       |
| VG3620-4C    | <i>MATa trp1Δ::pGPD1-TIR1-CaTRP1 lys4::LacO(DK)-NAT leu2-3,112 pHIS3-GFPLacl-HIS3:his3-11,15 ura3-52 bar1</i>                                                      | Çamdere et al. 2015      |
| VG3633-2D    | <i>MATa ECO1-3V5-AID2-KANMX trp1Δ::pGPD1-TIR1-CaTRP1 lys4::LacO(DK)-NAT leu2-3,112 pHIS3-GFPLacl-HIS3:his3-11,15 bar1 ura3-52</i>                                  | this study               |
| VG3651-3D    | <i>MATa SMC3-3V5-AID<sup>608</sup> trp1Δ::pGPD1-TIR1-CaTRP1 lys4::LacO(DK)-NAT pHIS3-GFPLacl-HIS3:his3-11,15 leu2-3,112 ura3-52 bar1</i>                           | Çamdere et al. 2015      |

687 **References**

688

689 Anderson, D. E., Losada, A., Erickson, H. P., & Hirano, T. (2002). Condensin and  
690 cohesin display different arm conformations with characteristic hinge angles. *The*  
691 *Journal of Cell Biology*, 156(3), 419–424.

692

693 Arumugam, P., Nishino, T., Haering, C. H., Gruber, S., & Nasmyth, K. (2006). Cohesin's  
694 ATPase activity is stimulated by the C-terminal Winged-Helix domain of its kleisin  
695 subunit. *Current Biology : CB*, 16(20), 1998–2008.

696

697 Beckouët, F., Hu, B., Roig, M. B., Sutani, T., Komata, M., Uluocak, P., et al. (2010). An  
698 Smc3p acetylation cycle is essential for establishment of sister chromatid cohesion.  
699 *Molecular Cell*, 39(5), 689–699.

700

701 Beckouët, F., Srinivasan, M., Roig, M. B., Chan, K.-L., Scheinost, J. C., Batty, P., et al.  
702 (2016). Releasing Activity Disengages Cohesin's Smc3/Scc1 Interface in a Process  
703 Blocked by Acetylation. *Molecular Cell*, 61(4), 563–574.

704

705 Rolef Ben-Shahar, T., Heeger, S., Lehane, C., East, P., Flynn, H., Skehel, M., &  
706 Uhlmann, F. (2008). Eco1-dependent cohesin acetylation during establishment of sister  
707 chromatid cohesion. *Science*, 321(5888), 563–566.

708

709 Çamdere, G., Guacci, V., Stricklin, J., & Koshland, D. (2015). The ATPases of cohesin  
710 interface with regulators to modulate cohesin-mediated DNA tethering. *eLife*, 4, 13115.

711

712 Chan, K.-L., Gligoris, T., Upcher, W., Kato, Y., Shirahige, K., Nasmyth, K., & Beckouët,  
713 F. (2013). Pds5p promotes and protects cohesin acetylation. *Proceedings of the*  
714 *National Academy of Sciences of the United States of America*, 110(32), 13020–13025.

715

716 Ciosk, R., Shirayama, M., Shevchenko, A., Tanaka, T., Tóth, A., Shevchenko, A., &  
717 Nasmyth, K. (2000). Cohesin's Binding to Chromosomes Depends on a Separate  
718 Complex Consisting of Scc3p and Scc4p Proteins. *Molecular Cell*, 5(2), 243–254.

719

720 D'Ambrosio, L. M., & Lavoie, B. D. (2014). Pds5p Prevents the PolySUMO-Dependent  
721 Separation of Sister Chromatids. *Current Biology*, 24(4), 361–371.

722

723 Duncan, F. E., Hornick, J. E., Lampson, M. A., Schultz, R. M., Shea, L. D., & Woodruff,  
724 T. K. (2012). Chromosome cohesion decreases in human eggs with advanced maternal  
725 age. *Aging Cell*, 11(6), 1121–1124.

726

727 Elbatsh, A. M. O., Haarhuis, J. H. I., Petela, N., Chapard, C., Fish, A., Celie, P. H., et al.  
728 (2016). Cohesin Releases DNA through Asymmetric ATPase-Driven Ring Opening.  
729 *Molecular Cell*, 61(4), 575–588.

730

- 731 Eng, T., Guacci, V., & Koshland, D. (2014). ROCC, a conserved region in cohesin's  
732 Mcd1p subunit, is essential for the proper regulation of the maintenance of cohesion  
733 and establishment of condensation. *Molecular Biology of the Cell*, 25(16), 2351–2364.  
734
- 735 Eng, T., Guacci, V., & Koshland, D. (2015). Interallelic complementation provides  
736 functional evidence for cohesin-cohesin interactions on DNA. *Molecular Biology of the*  
737 *Cell*, 26(23), 4224–4235.  
738
- 739 Glynn, E. F., Megee, P. C., Yu, H.-G., Mistrot, C., Unal, E., Koshland, D. E., et al.  
740 (2004). Genome-wide mapping of the cohesin complex in the yeast *Saccharomyces*  
741 *cerevisiae*. *PLoS Biology*, 2(9), E259.  
742
- 743 Gruber, S., Haering, C. H., & Nasmyth, K. (2003). Chromosomal Cohesin Forms a Ring.  
744 *Cell*, 112(6), 765–777.  
745
- 746 Guacci, V., & Koshland, D. (2012). Cohesin-independent segregation of sister  
747 chromatids in budding yeast. *Molecular Biology of the Cell*, 23(4), 729–739.  
748
- 749 Guacci, V., Koshland, D., & Strunnikov, A. (1997). A Direct Link between Sister  
750 Chromatid Cohesion and Chromosome Condensation Revealed through the Analysis of  
751 MCD1 in *S. cerevisiae*. *Cell*, 91(1), 47–57.  
752
- 753 Guacci, V., Hogan, E., & Koshland, D. (1994). Chromosome condensation and sister  
754 chromatid pairing in budding yeast. *The Journal of Cell Biology*, 125(3), 517–530.  
755
- 756 Haering, C. H., Löwe, J., Hochwagen, A., & Nasmyth, K. (2002). Molecular architecture  
757 of SMC proteins and the yeast cohesin complex. *Molecular Cell*, 9(4), 773–788.  
758
- 759 Hartman, T., Stead, K., Koshland, D., & Guacci, V. (2000). Pds5p Is an Essential  
760 Chromosomal Protein Required for Both Sister Chromatid Cohesion and Condensation  
761 in *Saccharomyces cerevisiae*. *The Journal of Cell Biology*, 151(3), 613–626.  
762
- 763 Hirano, M., Anderson, D. E., Erickson, H. P., & Hirano, T. (2001). Bimodal activation of  
764 SMC ATPase by intra- and inter-molecular interactions. *The EMBO Journal*, 20(12),  
765 3238–3250.  
766
- 767 Heidinger-Pauli, J. M., Unal, E., & Koshland, D. (2009). Distinct Targets of the Eco1  
768 Acetyltransferase Modulate Cohesion in S Phase and in Response to DNA Damage.  
769 *Molecular Cell*, 34(3), 311–321.  
770
- 771 Heidinger-Pauli, J. M., Mert, O., Davenport, C., Guacci, V., & Koshland, D. (2010).  
772 Systematic reduction of cohesin differentially affects chromosome segregation,  
773 condensation, and DNA repair. *Current Biology : CB*, 20(10), 957–963.  
774

- 775 Hons, M. T., Veld, P. J. H. I. T., Kaesler, J., Rombaut, P., Schleiffer, A., Herzog, F., et  
776 al. (2016). Topology and structure of an engineered human cohesin complex bound to  
777 Pds5B. *Nature Communications*, 7, 12523.
- 778  
779 Huber, R. G., Kulemzina, I., Ang, K., Chavda, A. P., Suranthran, S., Teh, J.-T., et al.  
780 (2016). Impairing Cohesin Smc1/3 Head Engagement Compensates for the Lack of  
781 Eco1 Function. *Structure*.
- 782  
783 Huis in t Veld, P. J., Herzog, F., Ladurner, R., Davidson, I. F., Piric, S., Kreidl, E., et al.  
784 (2014). Characterization of a DNA exit gate in the human cohesin ring. *Science*,  
785 346(6212), 968–972.
- 786  
787 Kamada, K., Su'etsugu, M., Takada, H., Miyata, M., & Hirano, T. (2017). Overall Shapes  
788 of the SMC-ScpAB Complex Are Determined by Balance between Constraint and  
789 Relaxation of Its Structural Parts. *Structure*, 25(4), 603–616.e4.
- 790  
791 Kulemzina, I., Ang, K., Zhao, X., Teh, J.-T., Verma, V., Suranthran, S., et al. (2016). A  
792 Reversible Association between Smc Coiled Coils Is Regulated by Lysine Acetylation  
793 and Is Required for Cohesin Association with the DNA. *Molecular Cell*, 63(6), 1044–  
794 1054.
- 795  
796 Kurze, A., Michie, K. A., Dixon, S. E., Mishra, A., Itoh, T., Khalid, S., et al. (2011). A  
797 positively charged channel within the Smc1/Smc3p hinge required for sister chromatid  
798 cohesion. *The EMBO Journal*, 30(2), 364–378.
- 799  
800 Laloraya, S., Guacci, V., & Koshland, D. (2000). Chromosomal addresses of the  
801 cohesin component Mcd1p. *The Journal of Cell Biology*, 151(5), 1047–1056.
- 802  
803 Lee, B.-G., Roig, M. B., Jansma, M., Petela, N., Metson, J., Nasmyth, K., & Löwe, J.  
804 (2016). Crystal Structure of the Cohesin Gatekeeper Pds5 and in Complex with Kleisin  
805 Scc1. *Cell Reports*, 14(9), 2108–2115.
- 806  
807 Lengronne, A., McIntyre, J., Katou, Y., Kanoh, Y., Hopfner, K.-P., Shirahige, K., &  
808 Uhlmann, F. (2006). Establishment of sister chromatid cohesion at the *S. cerevisiae*  
809 replication fork. *Molecular Cell*, 23(6), 787–799.
- 810  
811 Mc Intyre, J. M., Muller, E. G., Weitzer, S., Snyderman, B. E., Davis, T. N., & Uhlmann,  
812 F. (2007). In vivo analysis of cohesin architecture using FRET in the budding yeast  
813 *Saccharomyces cerevisiae*. *The EMBO Journal*, 26(16), 3783–3793.
- 814  
815 Megee, P. C., Mistrot, C., Guacci, V., & Koshland, D. (1999). The centromeric sister  
816 chromatid cohesion site directs Mcd1p binding to adjacent sequences. *Molecular Cell*,  
817 4(3), 445–450.
- 818  
819 Michaelis, C., Ciosk, R., & Nasmyth, K. (1997). Cohesins: Chromosomal Proteins that  
820 Prevent Premature Separation of Sister Chromatids. *Cell*, 91(1), 35–45.

821  
822 Milutinovich, M., Ünal, E., Ward, C., Skibbens, R. V., & Koshland, D. (2007). A Multi-  
823 Step Pathway for the Establishment of Sister Chromatid Cohesion. *PLoS Genet*, 3(1),  
824 e12.  
825  
826 Minnen, A., Bürmann, F., Wilhelm, L., Anchimiuk, A., Diebold-Durand, M.-L., & Gruber,  
827 S. (2016). Control of Smc Coiled Coil Architecture by the ATPase Heads Facilitates  
828 Targeting to Chromosomal ParB/parS and Release onto Flanking DNA. *Cell Reports*,  
829 14(8), 2003–2016.  
830  
831 Mishra, A., Hu, B., Kurze, A., Beckouët, F., Farcas, A.-M., Dixon, S. E., et al. (2010).  
832 Both interaction surfaces within cohesin's hinge domain are essential for its stable  
833 chromosomal association. *Current Biology : CB*, 20(4), 279–289.  
834  
835 Muir, K. W., Kschonsak, M., Li, Y., Metz, J., Haering, C. H., & Panne, D. (2016).  
836 Structure of the Pds5-Scc1 Complex and Implications for Cohesin Function. *Cell*  
837 *Reports*, 14(9), 2116–2126.  
838  
839 Murayama, Y., & Uhlmann, F. (2015). DNA Entry into and Exit out of the Cohesin Ring  
840 by an Interlocking Gate Mechanism. *Cell*, 163(7), 1628–1640.  
841  
842 Nishimura, K., Fukagawa, T., Takisawa, H., Kakimoto, T., & Kanemaki, M. (2009). An  
843 auxin-based degron system for the rapid depletion of proteins in nonplant cells. *Nature*  
844 *Methods*, 6(12), 917–922.  
845  
846 Noble, D., Kenna, M. A., Dix, M., Skibbens, R. V., Ünal, E., & Guacci, V. (2006).  
847 Intersection between the regulators of sister chromatid cohesion establishment and  
848 maintenance in budding yeast indicates a multi-step mechanism. *Cell Cycle*  
849 *(Georgetown, Tex.)*, 5(21), 2528–2536.  
850  
851 Onn, I., Heidinger-Pauli, J. M., Guacci, V., Unal, E., & Koshland, D. E. (2008). Sister  
852 chromatid cohesion: a simple concept with a complex reality. *Annual Review of Cell and*  
853 *Developmental Biology*, 24(1), 105–129.  
854  
855 Ouyang, Z., Zheng, G., Tomchick, D. R., Luo, X., & Yu, H. (2016). Structural Basis and  
856 IP6 Requirement for Pds5-Dependent Cohesin Dynamics. *Molecular Cell*, 62(2), 248–  
857 259.  
858  
859 Panizza, S., Tanaka, T., Hochwagen, A., Eisenhaber, F., & Nasmyth, K. (2000). Pds5  
860 cooperates with cohesin in maintaining sister chromatid cohesion. *Current Biology : CB*,  
861 10(24), 1557–1564.  
862  
863 Rolef Ben-Shahar, T., Heeger, S., Lehane, C., East, P., Flynn, H., Skehel, M., &  
864 Uhlmann, F. (2008). Eco1-dependent cohesin acetylation during establishment of sister  
865 chromatid cohesion. *Science*, 321(5888), 563–566.  
866

867 Rowland, B. D., Roig, M. B., Nishino, T., Kurze, A., Uluocak, P., Mishra, A., et al.  
868 (2009). Building sister chromatid cohesion: smc3 acetylation counteracts an  
869 antiestablishment activity. *Molecular Cell*, 33(6), 763–774.  
870

871 Sakai, A., Hizume, K., Sutani, T., Takeyasu, K., & Yanagida, M. (2003). Condensin but  
872 not cohesin SMC heterodimer induces DNA reannealing through protein–protein  
873 assembly. *The EMBO Journal*, 22(11), 2764–2775.  
874

875 Skibbens, R. V., Corson, L. B., Koshland, D., & Hieter, P. (1999). Ctf7p is essential for  
876 sister chromatid cohesion and links mitotic chromosome structure to the DNA replication  
877 machinery. *Genes & Development*, 13(3), 307–319.  
878

879 Soh, Y.-M., Bürmann, F., Shin, H.-C., Oda, T., Jin, K. S., Toseland, C. P., et al. (2015).  
880 Molecular Basis for SMC Rod Formation and Its Dissolution upon DNA Binding.  
881 *Molecular Cell*, 57(2), 290–303.  
882

883 Stead, K., Aguilar, C., Hartman, T., Drexel, M., Meluh, P., & Guacci, V. (2003). Pds5p  
884 regulates the maintenance of sister chromatid cohesion and is sumoylated to promote  
885 the dissolution of cohesion. *The Journal of Cell Biology*, 163(4), 729–741.  
886

887 Tanaka, K., Hao, Z., Kai, M., & Okayama, H. (2001). Establishment and maintenance of  
888 sister chromatid cohesion in fission yeast by a unique mechanism. *The EMBO Journal*,  
889 20(20), 5779–5790.  
890

891 Tóth, A., Ciosk, R., Uhlmann, F., Galova, M., Schleiffer, A., & Nasmyth, K. (1999). Yeast  
892 cohesin complex requires a conserved protein, Eco1p(Ctf7), to establish cohesion  
893 between sister chromatids during DNA replication. *Genes & Development*, 13(3), 320–  
894 333.  
895

896 Ünal, E., Heidinger-Pauli, J. M., Kim, W., Guacci, V., Onn, I., Gygi, S. P., & Koshland,  
897 D. E. (2008). A molecular determinant for the establishment of sister chromatid  
898 cohesion. *Science*, 321(5888), 566–569.  
899

900 Wahba, L., Gore, S. K., Koshland, D., & Proudfoot, N. (2013). The homologous  
901 recombination machinery modulates the formation of RNA–DNA hybrids and associated  
902 chromosome instability. *eLife*, 2, e00505.  
903

904 Zhang, J., Shi, X., Li, Y., Kim, B.-J., Jia, J., Huang, Z., et al. (2008). Acetylation of  
905 Smc3p by Eco1p Is Required for S Phase Sister Chromatid Cohesion in Both Human  
906 and Yeast. *Molecular Cell*, 31(1), 143–151.  
907  
908  
909  
910  
911



912 **Figure Legends**

913 Figure 1: The *smc3-D667* RID mutation maps to a loop near the South interface of the  
914 Smc3p hinge.

915 A. Diagram of cohesin highlighting location of the *smc3-D667* RID insertion. The  
916 homologous residue of *smc3-D667*, highlighted in orange, was determined by sequence  
917 alignment using ClustalW and mapped onto the mouse Smc1p/Smc3p hinge crystal  
918 structure (PDB: 2WD5, Kurze et al. 2011). Other RIDs isolated in this screen and  
919 located in the hinge domain are represented as green spheres and their positions were  
920 also approximated by sequence alignment. B. Sequence alignment of Smc3p  
921 homologues showing the conserved region around D667. The position of Asp667 is  
922 highlighted in orange and the sequence of the five-amino acid insertion, AAAAD, that  
923 follows Asp667 in the *smc3-D667* RID is depicted above as an orange dot. The position  
924 of other RIDs in this region are shown with green dots, and conserved glycine residues  
925 shown with blue dots. C. The *smc3-D667* allele under the native *SMC3* promoter is  
926 unable to support viability. Cultures of haploid strains *SMC3 SMC3-AID* (BRY474),  
927 *SMC3-AID* (VG3651-3D), and *smc3-D667 SMC3-AID* (BRY482) were grown to  
928 saturation in YPD then plated in 10-fold serial dilutions onto YPD alone (YPD) or  
929 containing 0.75 mM auxin (auxin) then grown for two days at 23°C.

930

931 Figure 2: Cohesin containing *smc3-D667p* binds to chromosomes in mid-M phase  
932 arrested cells.

933 A. Regimen used to prepare cells synchronously arrested in mid-M phase. Cultures  
934 were grown to mid-log phase at 23°C, treated with alpha factor for three hours to arrest

935 cells in G1 phase then auxin was added and cells incubated an additional hour in G1 to  
936 deplete Smc3-3V5-AIDp. Cells were synchronously released from G1 arrest into YPD  
937 media containing auxin and nocodazole to re-arrest in mid-M phase (Materials and  
938 methods). B. Chromosome spreads showing that *smc3-D667p* cohesin binds  
939 chromosomes at levels similar to wild-type. Haploid *SMC3 SMC3-AID* (BRY474),  
940 *SMC3-AID* (VG3651-3D), and *smc3-D667 SMC3-AID* (BRY482) cells were grown as  
941 described in (A). Aliquots of mid-M phase arrested cells were fixed and processed for  
942 chromosome spreads. Bulk chromosomal DNA (DAPI) and cohesin binding ( $\alpha$ -Mcd1)  
943 are shown. C-D. ChIP showing that *smc3-D667* cohesin binds to CARs and  
944 centromeres. C. Haploid strains in (B) were arrested in mid-M phase as described in (A)  
945 then fixed and processed for ChIP as described in materials and methods. ChIP of  
946 Mcd1p binding at *CARC1* (left) and *TRM1* (middle) and at two centromeres (right). Wild-  
947 type strain *SMC3* (dotted lines and white bars), *smc3-D667* strain (black lines and black  
948 bars) and *SMC3-AID* alone (grey lines and grey bars). (D). ChIP of HA epitope tagged  
949 Smc3p and *smc3-D667p* at *CARC1* (left), *TRM1* (middle) and at two centromeres  
950 (right). Haploid strains *SMC3-6HA SMC3-AID* (BRY604; dotted lines and white bars),  
951 *smc3-6HA-D667 SMC3-AID* (BRY602; black lines and black bars) and *SMC3-AID* only  
952 (VG3651-3D; grey lines and grey bars) were arrested and processed for ChIP as  
953 described in (C).

954

955 Figure 3: The *smc3-D667* mutant exhibits a cohesion maintenance defect.

956 A. Schematic of cohesion loss assay using loci tagged with GFP-Lacl. After replication,  
957 cells with cohesion have a single GFP focus whereas cells where cohesion is lost have

958 2 GFP foci. B. Cohesion loss at *CEN*-proximal *TRP1* and *CEN*-distal *LYS4* loci in mid-M  
959 phase arrested cells. Haploid strains were arrested in G1, depleted of Smc3p-AID then  
960 synchronously released from G1 and re-arrested in mid-M phase under depletion  
961 conditions as described in Figure 2A. LacO arrays integrated at *TRP1* (left) in haploid  
962 *SMC3-AID* yeast alone (BRY676) or also containing wild-type *SMC3* (BRY678), or  
963 *smc3-D667* (BRY680). LacO arrays integrated at *LYS4* (right) in *SMC3-AID* yeast alone  
964 (VG3651-3D) or containing wild-type *SMC3* (BRY474), or *smc3-D667* (BRY482).  
965 Samples were collected from G1 arrested auxin treated cells and mid-M phase arrested  
966 cells and scored for cohesion. The percentage of cells with two GFP foci (sister  
967 separation) were averaged from two independent experiments and plotted. 100-200  
968 cells were scored per sample at each time point. Error bars represent SD. C. Time  
969 course to assess the kinetics of cohesion loss. Haploid strains were arrested in G1,  
970 treated with auxin, and synchronously released into mid-M phase arrest in auxin  
971 containing media as described in Figure 2A. Samples were collected in G1 and every  
972 fifteen minutes starting thirty minutes after G1 release and fixed to assess cohesion loss  
973 and DNA content. Data is shown as the percentage of cells with separated sisters. 100  
974 to 200 cells were scored for cohesion for each time point. DNA content was assessed  
975 by flow cytometry and shown in Supplemental Figure 3B,C. Left side shows cohesion  
976 loss at the *CEN*-proximal *TRP1* locus. Haploid strains *SMC3 SMC3-AID* (BRY678),  
977 *SMC3-AID* (BRY676), *smc3-D667 SMC3-AID* (BRY680) and *PDS5-AID* (BRY815).  
978 Right side shows cohesion loss at the *CEN*-distal *LYS4* locus. Haploid strains *SMC3*  
979 *SMC3-AID* (BRY474), *SMC3-AID* (VG3651-3D), *smc3-D667 SMC3-AID* (BRY482) and  
980 *PDS5-AID* (TE228). D. ChIP to assess Pds5p binding to chromosomes. Haploid strains

981 *SMC3 SMC3-AID* (BRY474), *SMC3-AID* (VG3651-3D) and *smc3-D667 SMC3-AID*  
982 (BRY482) arrested in mid-M phase according to the regimen in Figure 2A were fixed  
983 and processed for ChIP using polyclonal anti-Pds5p antibody. Pds5p binding was  
984 assessed at the CAR *TRM1* (top), and centromeres I and XIV (bottom). E. Smc3-D667p  
985 supports assembly of cohesin containing Pds5p and Scc3-3FLAGp. Haploid strains  
986 *SMC3-AID* (VG3561-3D), *SCC3-3FLAG SMC3-AID* (BRY607), *SMC3-6HA SMC3-AID*  
987 (BRY604), *SCC3-3FLAG SMC3-6HA SMC3-AID* (BRY621) and *SCC3-3FLAG smc3-*  
988 *6HA-D667 SMC3-AID* (BRY625) cells were grown as described in Figure 2A. Protein  
989 extracts were made and Scc3p immunoprecipitated using anti-FLAG antibody,  
990 subjected to SDS-PAGE and Western blot analysis using the indicated antibodies.  
991 Dotted line indicates where an irrelevant lane was removed.

992

993 Figure 4: *smc3-D667* supports stable cohesin binding to chromosomes

994 A. Regimen used to assess stability of cohesin binding to DNA upon depletion of the  
995 loader subunit Scc2p. Haploid *SMC3-3V5-AID SCC2-3FLAG-AID2* strains expressing  
996 either *SMC3-6HA* (BRY839) or *smc3-6HA-D667* (BRY841) were grown to mid-log  
997 phase and arrested in mid-M phase by incubation with nocodazole for three hours.  
998 Cultures were split and auxin added to one half then both halves incubated for one  
999 hour. Cells aliquots were collected to make protein extracts or fixed and processed for  
1000 ChIP (Materials and Methods). B. Western Blot analysis showing depletion of AID  
1001 tagged proteins. Protein extracts (TCA lysed) of strains in (A) were subjected to SDS-  
1002 PAGE and analyzed by Western blot. Depletion of Scc2p-3FLAG-AID (FLAG) and  
1003 Smc3p-3V5-AID (V5) is shown. Antibodies assessing levels of Smc3p (HA) and Mcd1p

1004 (Mcd1) cohesin subunits and a loading control (Tub1). C. ChIP to assess the stability of  
1005 cohesin (Smc3p) binding at CARs and centromeres. Cultures of strains from (A) were  
1006 fixed and processed for ChIP. Smc3-6HAp binding (left side) and smc3-6HA-D667p  
1007 binding (right side) at CARs and centromeres in control cells (solid lines and filled  
1008 columns) and auxin-treated cells depleted for Scc2-3FLAG-AID2p and Smc3-3V5-AIDp  
1009 (dashed lines and open columns). From top to bottom: binding to CARs *TRP1* and  
1010 *CARL1*, and centromeres XIV and IV.

1011

1012 Figure 5: smc3-D667p has reduced acetylation at K113

1013 A. Regimen used to assess Smc3-K113 acetylation in mid-M phase arrested cells. Early  
1014 log phase cultures were treated with 0.75 mM auxin for one hour to deplete Smc3-3V5-  
1015 AIDp then nocodazole was added and cultures incubated three hours to arrest cells in  
1016 mid-M phase. B. Reduced K113 acetylation of smc3-D667p. Haploid *ECO1-AID*  
1017 (VG3633-2D), *SMC3-AID* (VG3651-3D), *SMC3 SMC3-AID* (BRY474), and *smc3-D667*  
1018 *SMC3-AID* (BRY482) cultures grown as described in (A). Protein extracts were made  
1019 and subjected to SDS-PAGE then analyzed by Western blot. Antibodies against Smc3-  
1020 K113 acetylation (Smc3-ac) are shown as short and long exposures, anti-Mcd1p  
1021 antibodies (Mcd1p) serve as control for cohesin levels and antibodies against tubulin  
1022 (Tub1) for a loading control. C. Regimen used to determine the kinetics of Smc3-K113  
1023 acetylation establishment within a single cell cycle. Log phase cultures grown in YPD at  
1024 23°C were arrested in G1 using alpha factor, treated with auxin to deplete Smc3p-AID in  
1025 G1 then released into fresh YPD containing auxin and nocodazole to synchronously  
1026 arrest cells in mid-M phase (Materials and methods). D. smc3-6HA-D667p has reduced

1027 acetylation in S phase but acetylation remains in mid-M phase. Haploid *SMC3-AID* cells  
1028 expressing Smc3-6HAp (BRY604, left) or smc3-6HA-D667p (BRY602, right) were  
1029 grown as described in (C). Aliquots were taken at the indicated time points and protein  
1030 extracts made. A small portion was reserved for total protein then anti-HA antibody  
1031 added to immunoprecipitate Smc3-6HAp or smc3-6HA-D667p (Materials and Methods).  
1032 Samples were subjected to SDS-PAGE then analyzed by Western blot. Antibodies  
1033 against Smc3-K113 acetylation (Smc3-ac) and both short and long exposure shown for  
1034 better comparison. Antibodies were used to monitor levels of the Smc3p (HA) and  
1035 Mcd1p (Mcd1) cohesin subunits and anti-Tubulin antibodies (Tub1) used as a loading  
1036 control. Samples were also collected to assess DNA content by flow cytometry (right  
1037 side). E. Similar levels of K113 acetylation in *smc3-D667* and *eco1-203* at permissive  
1038 temperature. Haploid strains *SMC3-AID* (VG3651-3D), *SMC3 SMC3-AID* (BRY474),  
1039 *smc3-D667 SMC3-AID* (BRY482) and *eco1-203* (VG3506-5D) were treated as  
1040 described in (A). Protein extracts were made, subjected to SDS-PAGE and Western blot  
1041 analysis. Antibodies against Smc3-K113 acetylation (Smc3-ac) and both short and long  
1042 exposure shown for better comparison. Anti-MCD1 antibodies (Mcd1) were used as a  
1043 control for cohesin levels and anti-Tubulin antibodies (Tub1) for a loading control.

1044

1045 Figure 6: The *SMC1-D1164E* mutation fails to suppress the inviability or cohesion  
1046 defect of *smc3-D667*

1047 A. *smc1-D1164E* failed to restore viability to *smc3-D667* cells. Haploid strains *SMC3*  
1048 *SMC3-AID* (BRY474), *SMC3 SMC3-AID SMC1-D1164E* (BRY832), *SMC3-AID* (VG3651-  
1049 3D), *smc3-D667 SMC3-AID* (BRY482), and *smc3-D667 SMC3-AID SMC1-D1164E*

1050 (BRY833) were grown to saturation in YPD, then plated as ten-fold serial dilutions onto  
1051 YPD alone (YPD) or containing 0.75 mM auxin (YPD + auxin) and incubated 2 days at  
1052 23°C. B. *SMC1-D1164E* suppresses cohesion loss of the *eco1Δ wpl1Δ* mutant in mid-M  
1053 phase arrested cells. Haploid strains *eco1Δ wpl1Δ* (VG3503-4A), *SMC1-D1164E eco1Δ*  
1054 *wpl1Δ* (VG3575-2C) grown as described in Figure 2A. Cells from G1 and mid-M phase  
1055 arrest were fixed and processed and scored for cohesion loss at the *CEN*-distal *LYS4*  
1056 locus. C. *SMC1-D1164E* fails to suppress cohesion loss of *smc3-D667* cells. Haploid  
1057 strains *smc3-D667 SMC3-AID* (BRY482), *smc3-D667 SMC3-AID SMC1-D1164E*  
1058 (BRY833), and *SMC3 SMC3-AID SMC1-D1164E* (BRY832) cells were grown according  
1059 the regimen in Figure 2A and processed to assess cohesion loss at the *CEN*-distal *LYS4*  
1060 locus as described in (B). For both (B) and (C), the percentage of cells with two GFP foci  
1061 (sister separation) were derived from two independent experiments. 100-200 cells were  
1062 scored per sample at each time point. Error bars represent SD.

1063

1064 Figure 7: The *smc3-D667* mutant is defective in condensation and cohesion even in the  
1065 absence of cohesin antagonist Wpl1p.

1066 A. Condensation of the *rDNA* locus in *smc3-D667* cells. Percentage of chromosome  
1067 masses displaying tight loop, wide loop, or diffuse *rDNA* morphologies. Haploid strains  
1068 *SMC3 SMC3-AID* (BRY474), *SMC3-AID* (VG3651-3D), *smc3-D667 SMC3-AID*  
1069 (BRY482), and *PDS5-AID* (TE228) were grown and treated as in Figure 2A then  
1070 processed as if for *in situ* hybridization (see Materials and Methods). Chromosome  
1071 masses were scored for *rDNA* locus morphology after staining with DAPI. Shown are  
1072 averages from two independent experiments in which 100 chromosome masses were

1073 scored. Error bars depict SD. B. *wpl1* $\Delta$  fails to restore viability to *smc3-D667* cells.  
1074 Haploid *SMC3-AID* strain derivatives with *SMC3* (BRY474), *SMC3 wpl1* $\Delta$  (BRY716),  
1075 *smc3-D667* (BRY482), *smc3-D667 wpl1* $\Delta$  (BRY718), or *SMC3-AID* alone (VG3651-3D)  
1076 were grown and plated as described in Figure 1C. C. Quantification of condensed *rDNA*  
1077 masses from mid-M phase arrested cells. Haploid strains *SMC3-AID* (VG3651-3D),  
1078 *SMC3 SMC3-AID* (BRY474), *smc3-D667 SMC3-AID* (BRY482), *smc3-D667 SMC3-AID*  
1079 *wpl1* $\Delta$  (BRY718), and *wpl1* $\Delta$  (DK5561) were treated and processed as in (A). The  
1080 percentage of chromosome masses displaying a tight *rDNA* loop is shown. D. Cohesion  
1081 loss in *smc3-D667 wpl1* $\Delta$  cells. Haploid *wpl1* $\Delta$  (DK5561) and *SMC3-AID* strain  
1082 derivatives with *SMC3* (BRY474), *SMC3-AID* alone (VG3651-3D), *smc3-D667*  
1083 (BRY482), *smc3-D667 wpl1* $\Delta$  (BRY718) were treated as in Figure 2A and the  
1084 percentage of separated sisters at the *LYS4* locus plotted. Error bars represent the SD.  
1085

1086 Figure 8: The D667 region is necessary for interallelic complementation.

1087 A. Assessing whether *smc3-D667* complements the *smc3-42* mutant. Haploid strains  
1088 *SMC3* (VG3486), *smc3-42* (TE576), *smc3-D667* (BRY467), *smc3-42 smc3-D667*  
1089 (BRY756), *smc3-K113R* (VG3486-K113R), and *smc3-42 smc3-K113R* (TE578) all  
1090 contain the *SMC3 URA3 CEN* plasmid. Strains were grown to saturation in YPD  
1091 cultures to allow loss of the *SMC3 URA3 CEN* plasmid then plated at 10-fold serial  
1092 dilutions on YPD or 5-FOA plates and incubated at the indicated temperatures. B. Table  
1093 summarizes interallelic complementation of haploid cells harboring the temperature-  
1094 sensitive *smc3-42* allele (Eng et al. 2015) and (A).  
1095



1096 Supplementary Figure 1

1097 *SMC3* random insertion dominant (RID) screen workflow. A *pGAL-SMC3 URA3*

1098 CEN/ARS plasmid, pBR25, was subject to *in vitro* transposase mutagenesis to generate

1099 the RID library which consists of plasmids with fifteen additional nucleotides randomly

1100 inserted (see Materials and Methods). Haploid yeast were transformed with the *SMC3*

1101 RID library and selected on dextrose plates. Transformants were replica plated to

1102 galactose plates to induce expression by *pGAL*. Mutants that were inviable or had slow

1103 growth on galactose were tested to confirm that the RID plasmid was the cause of this

1104 phenotype. Confirmed RID plasmids were sequenced to determine insertion location.

1105

1106 Supplementary Figure 2

1107 Assessment of *smc3-D667p* cohesin binding to *CARL1*. A. ChIP of Mcd1p binding at

1108 the *CARL* locus. Samples from Figure 2C assayed for Mcd1p binding to *CARL*. Wild-

1109 type strain *SMC3 SMC3-AID* (dotted line), *smc3-D667 SMC3-AID* strain (black line) and

1110 *SMC3-AID* alone (grey line). B. ChIP of HA epitope tagged Smc3p and *smc3-D667p* at

1111 the *CARL* locus. Samples from Figure 2D assayed for Smc3p and *smc3-D667p* binding

1112 to *CARL*. *SMC3-6HA SMC3-AID* (dotted line), *smc3-6HA-D667 SMC3-AID* (black line)

1113 and *SMC3-AID* only (grey line).

1114

1115 Supplementary Figure 3

1116 Western analysis showing depletion of Smc3-AIDp and levels of cohesin subunits

1117 Mcd1p and HA-tagged Smc3p. Protein extracts from *SMC3-3V5-AID* strains expressing

1118 *SMC3-6HA<sup>607</sup>-D667* (BRY602), *SMC3-6HA<sup>607</sup>* (BRY604), or no additional *SMC3* allele  
1119 (VG3561-3D) in Figure 2D.

1120

1121 Supplementary Figure 4

1122 A. Flow cytometry to assess cell-cycle progression of cells from experiments in Figure  
1123 3C. Strains bearing the LacO array near the *CEN*-proximal *TRP1* locus (left) and *CEN*-  
1124 distal *LYS4* locus (right). B. ChIP of Pds5p binding at the *CEN*-proximal *CARC1* and  
1125 *CEN*-distal *CARL* loci (left) and *CEN14* (right). ChIP of samples from Figure 3D showing  
1126 Pds5p binding to *CARC1*, *CARL*, and *CEN14*. Wild-type strain *SMC3* (dotted lines and  
1127 white bars), *smc3-D667* strain (black lines and black bars) and *SMC3-AID* alone (grey  
1128 lines and grey bars).

1129

1130 Supplementary Figure 5

1131 Non-linearity of acetylated Smc3-K113 specific antibody, related to Figure 5. A culture  
1132 of the wild-type *SMC3-6HA SMC3-AID* (BRY604) haploid strain was grown as  
1133 described in Figure 5A. Total protein extract from mid-M phase-arrested cells was  
1134 obtained as described in Materials and methods. Extract was diluted 1:2 in buffer  
1135 containing 120mM HEPES pH 7.0 and 1% SDS and boiled 5 minutes at 95%. Boiled  
1136 extract was then diluted 1:2 in 2X Laemmli sample buffer to create the 100% protein  
1137 sample. This sample was then diluted in 2X Laemmli buffer to 80%, 60%, 40% and 20%  
1138 concentration and subjected to SDS-PAGE and Western analysis using the indicated  
1139 antibodies.

1140

## Figure 1

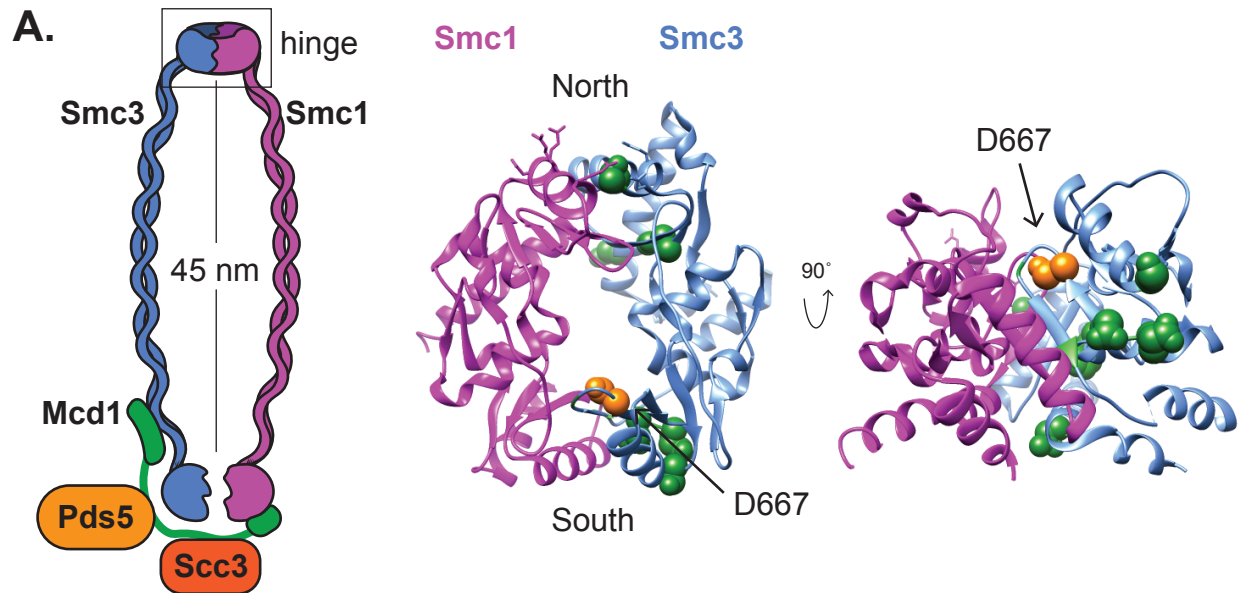

**B.**

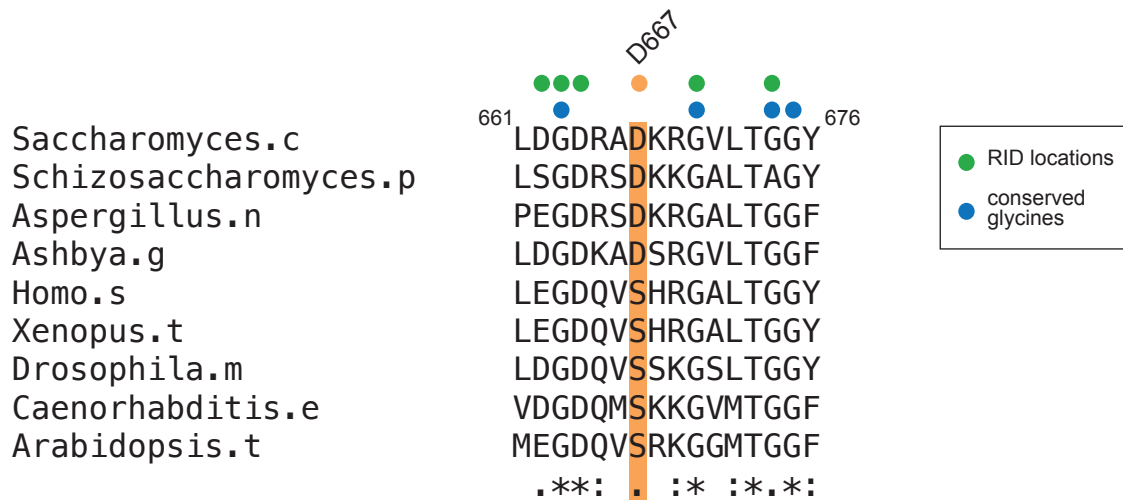

**C.**

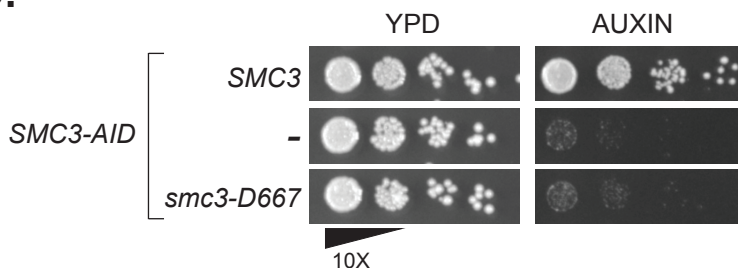

## Figure 2

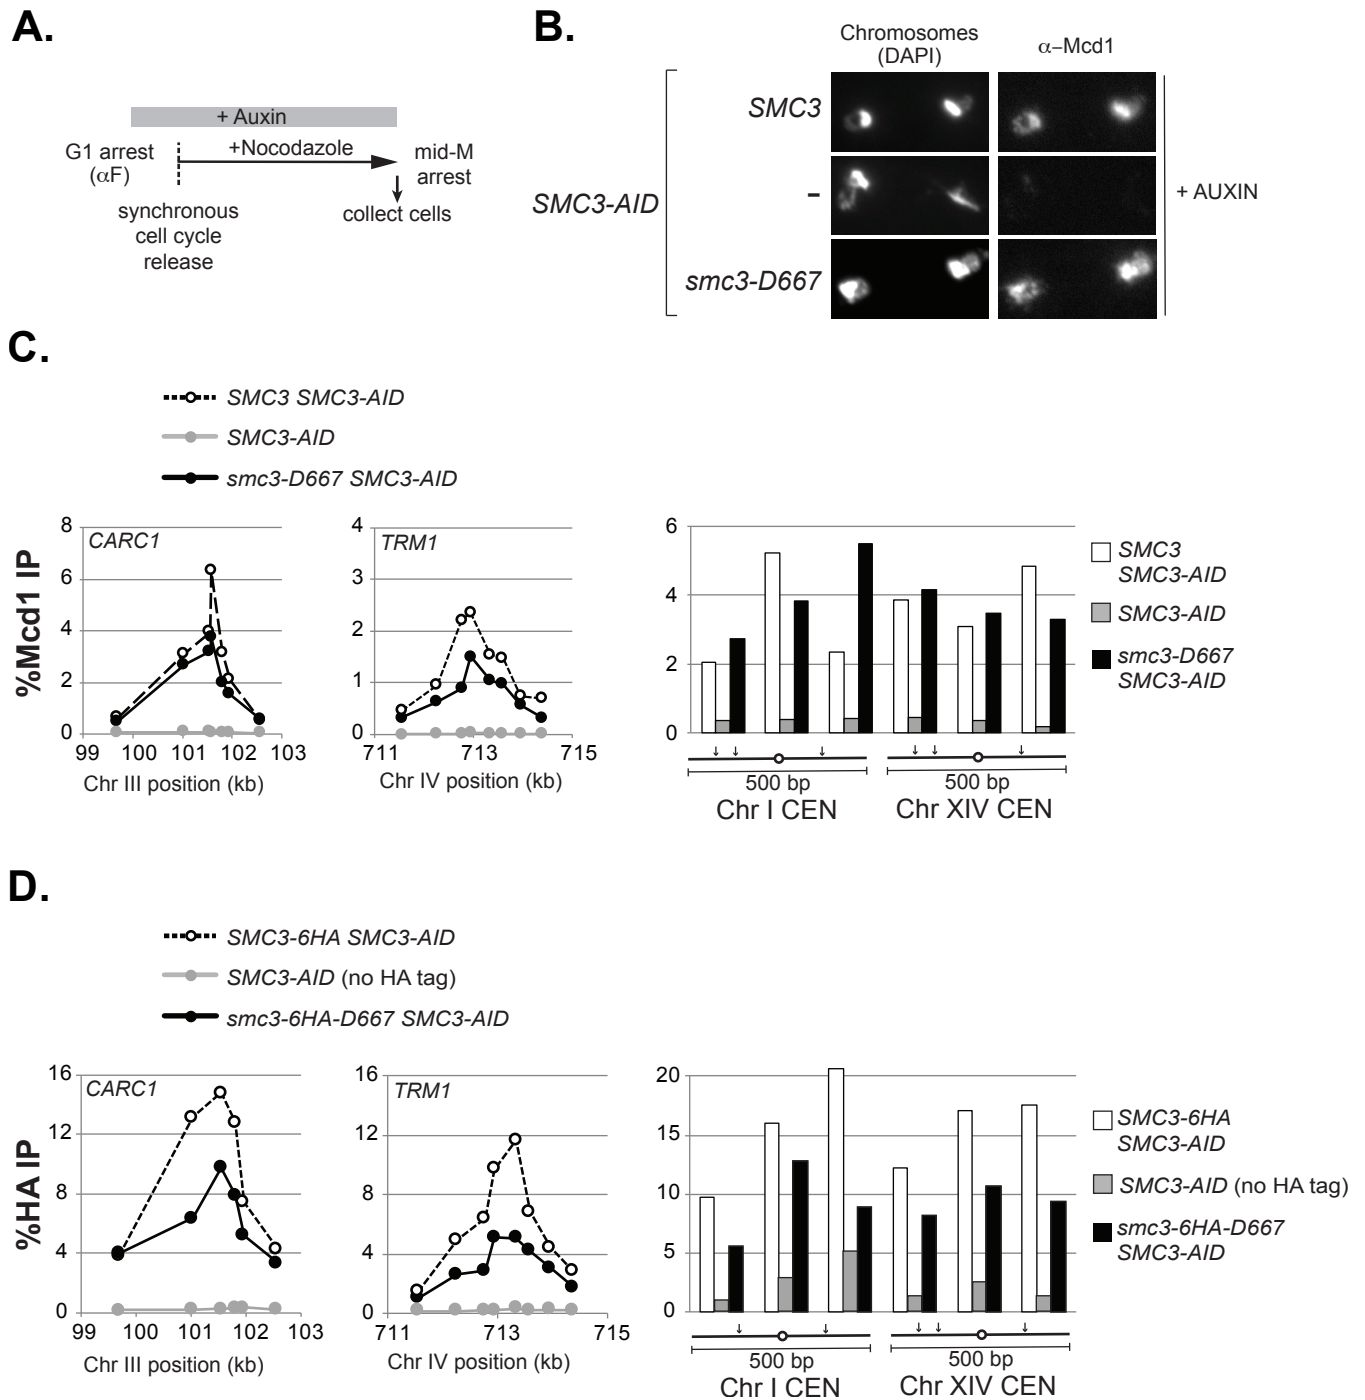

## Figure 3

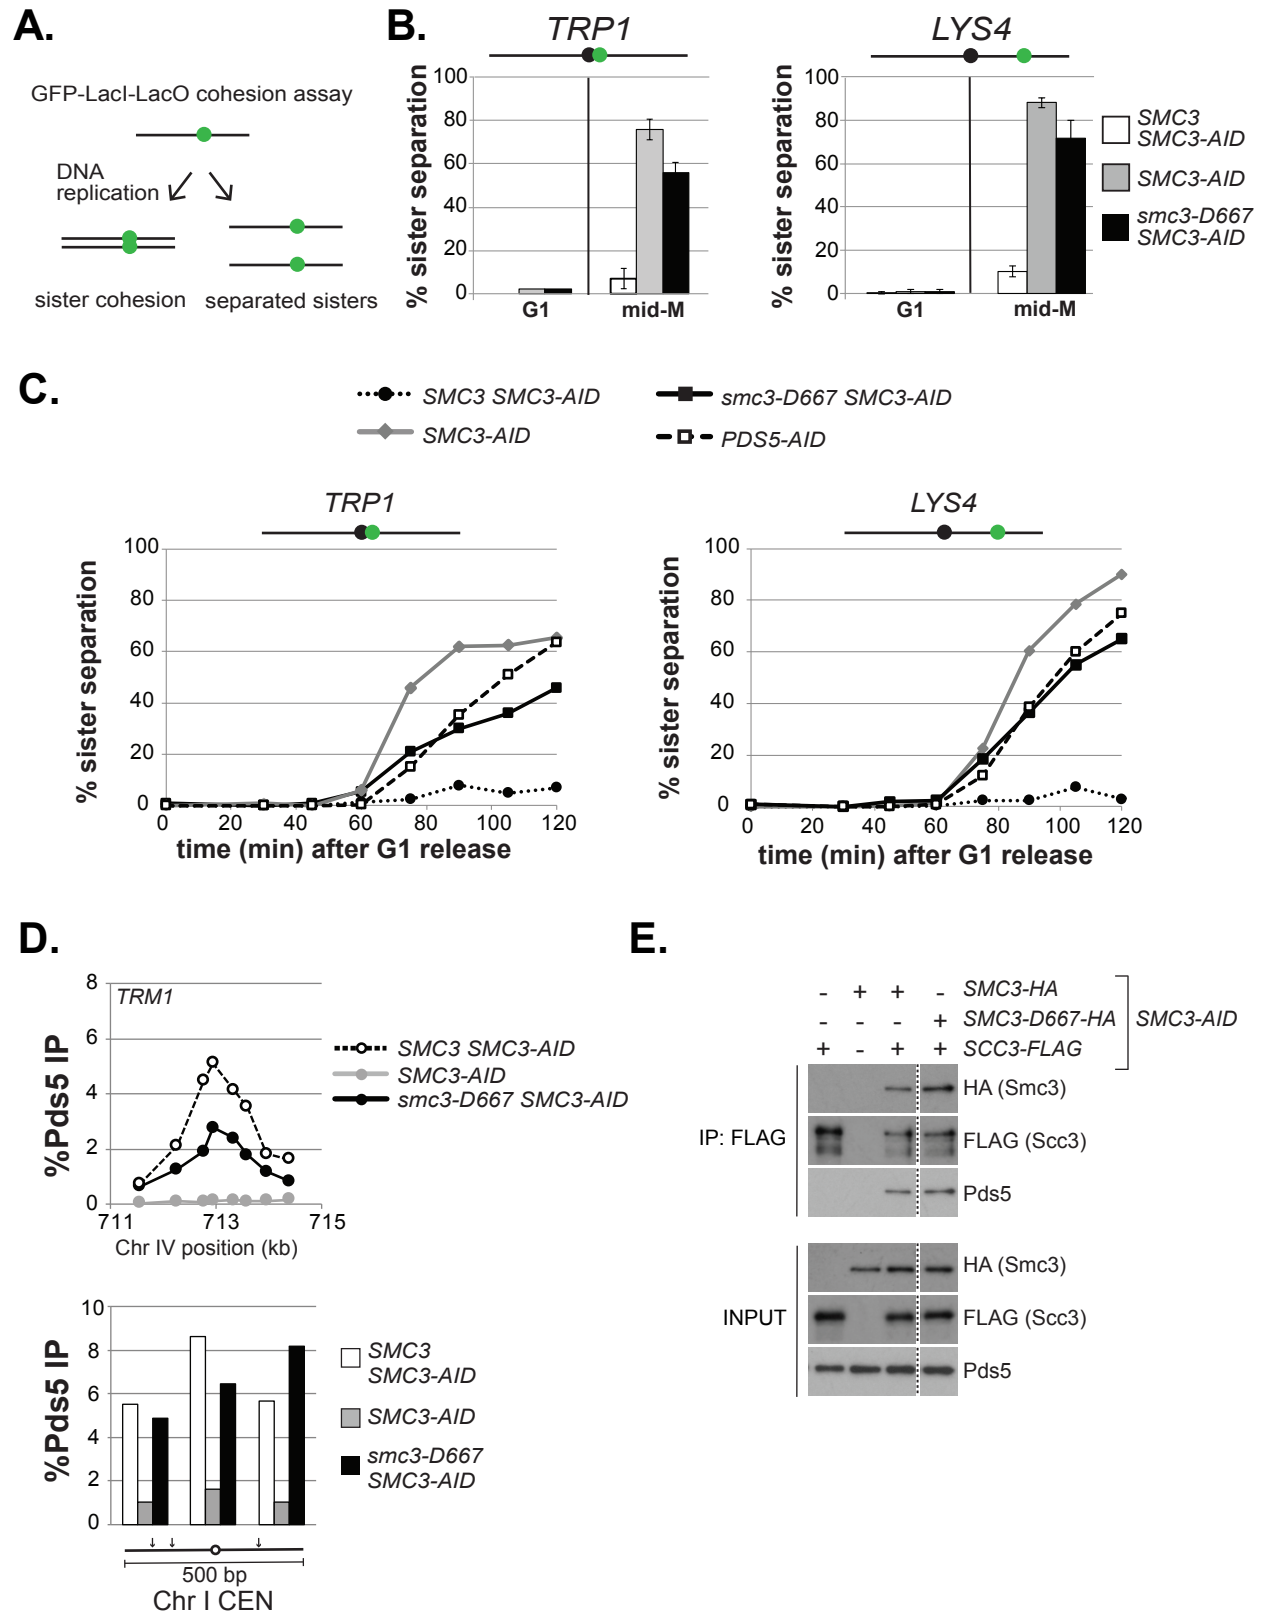

## Figure 4

**A.**

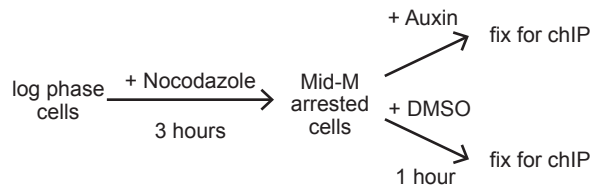

**B.**

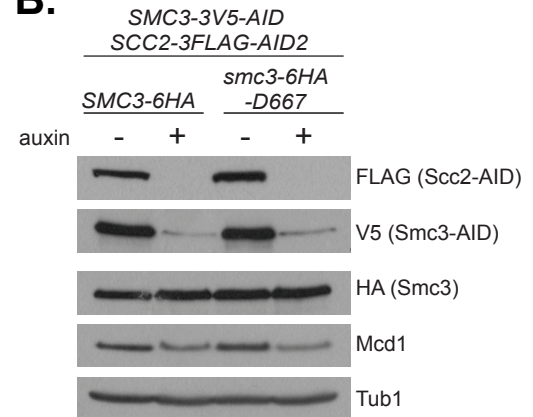

**C.**

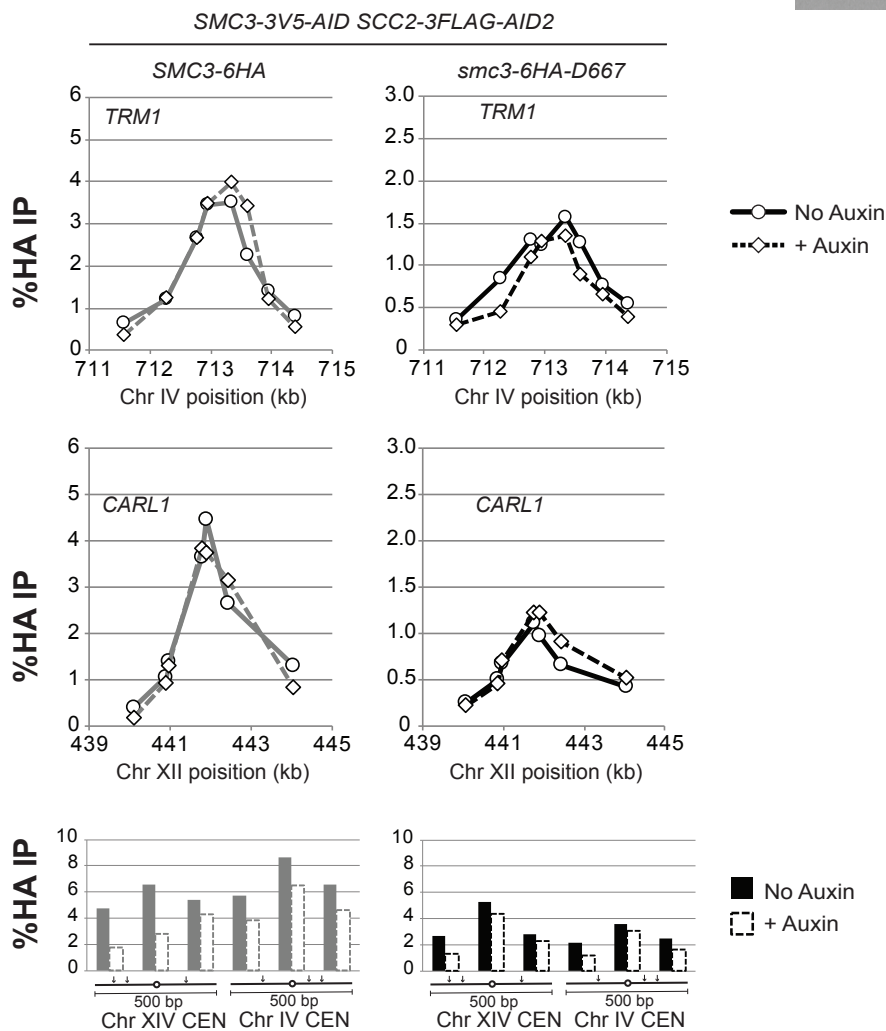

## Figure 5

**A.**

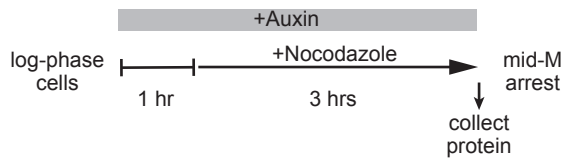

**B.**

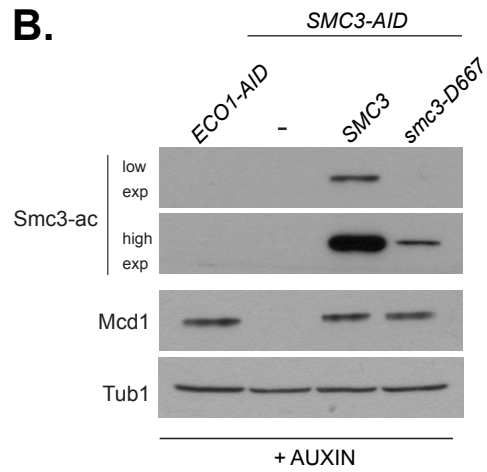

**C.**

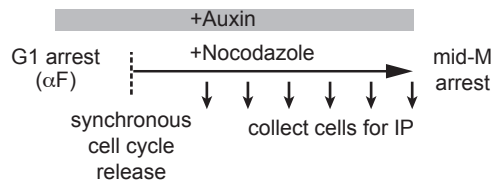

**D.**

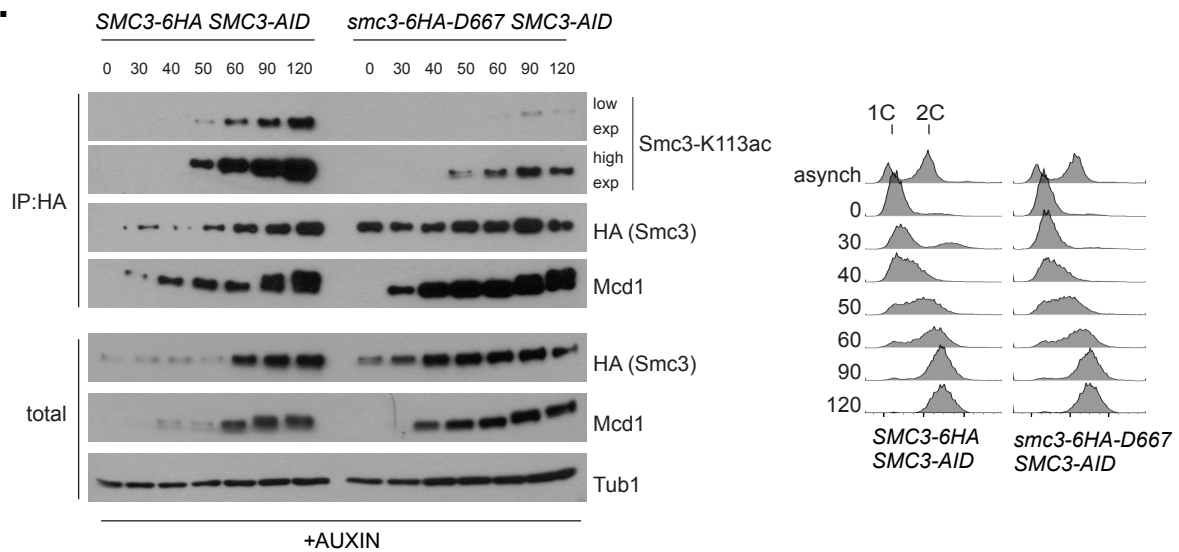

**E.**

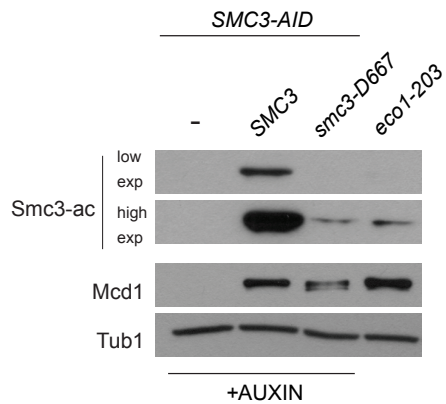

## Figure 6

**A.**

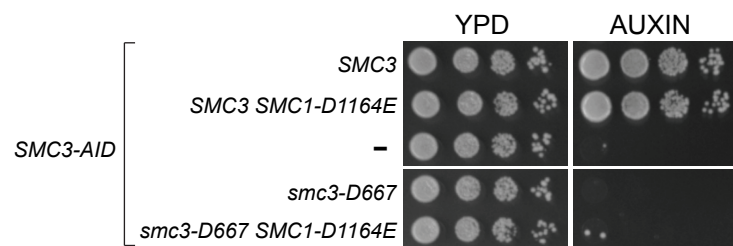

**B.**

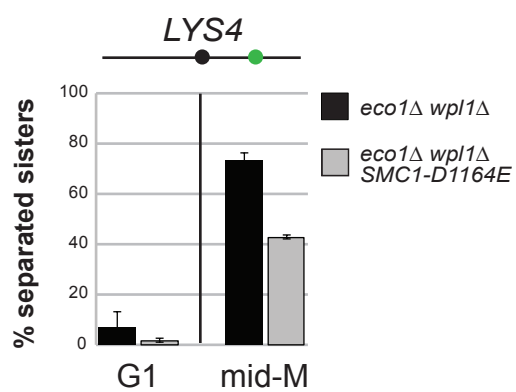

**C.**

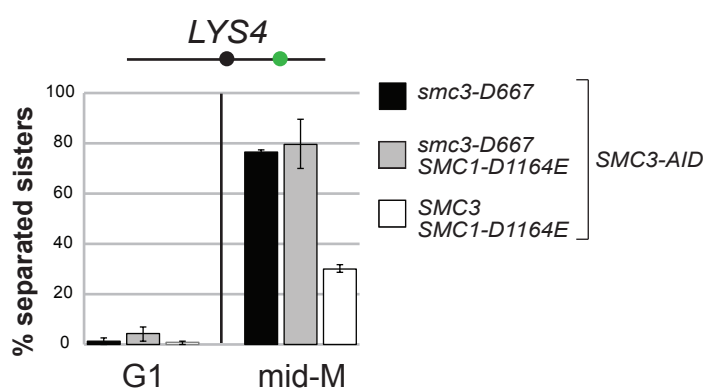



## Figure 7

**A.**

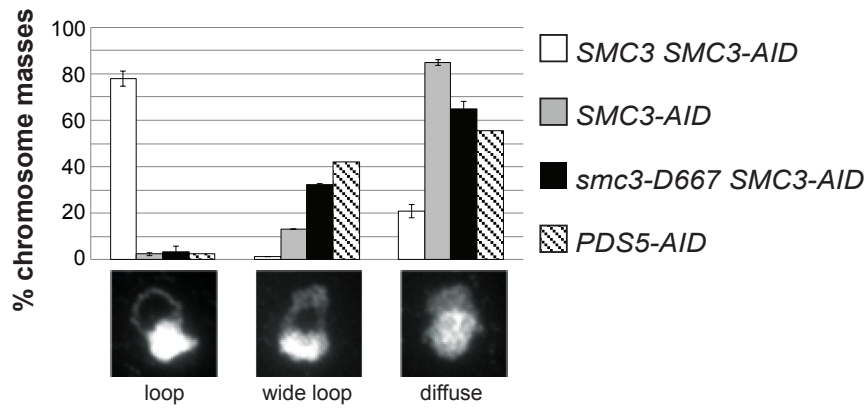

**B.**

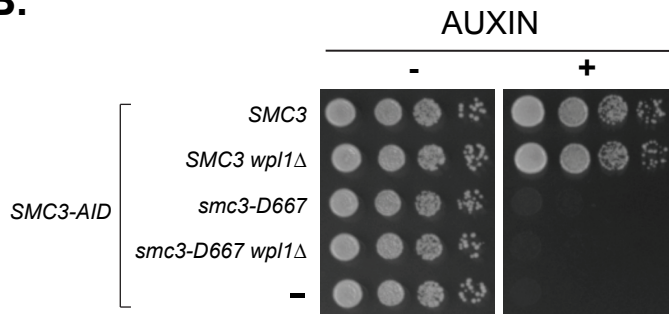

**C.**

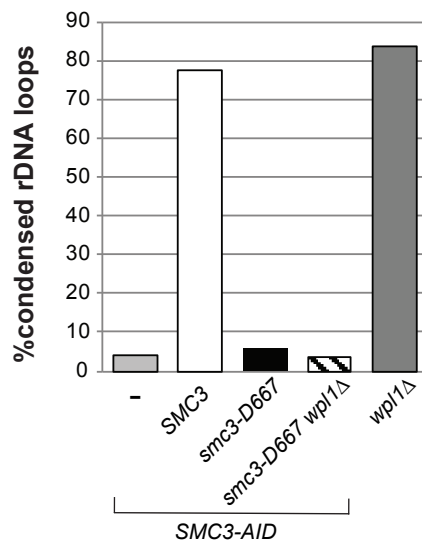

**D.**

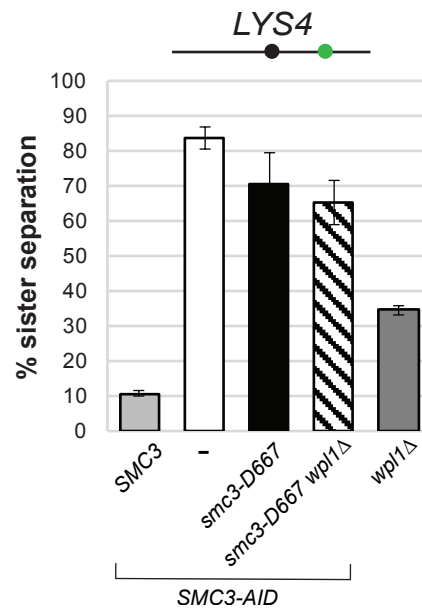

## Figure 8

**A.**

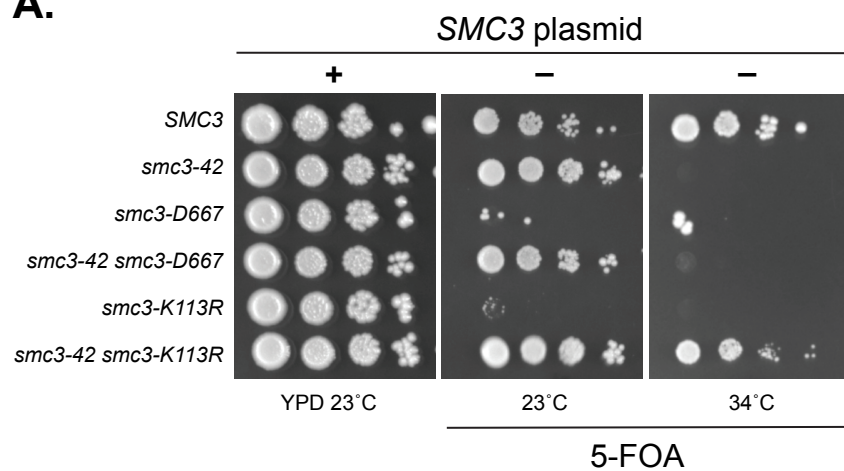

**B.**

| Genotype                  |  | Viability |      | Interallelic complementation |
|---------------------------|--|-----------|------|------------------------------|
|                           |  | 23°C      | 34°C |                              |
| <i>smc3-42</i>            |  | +         | -    | N/A                          |
| <i>smc3-K113R</i>         |  | -         | -    | N/A                          |
| <i>smc3-D667</i>          |  | -         | -    | N/A                          |
| <i>smc3-42 smc3-K113R</i> |  | +         | +    | YES                          |
| <i>smc3-42 smc3-D667</i>  |  | +         | -    | NO                           |

## Supplementary Figure 1

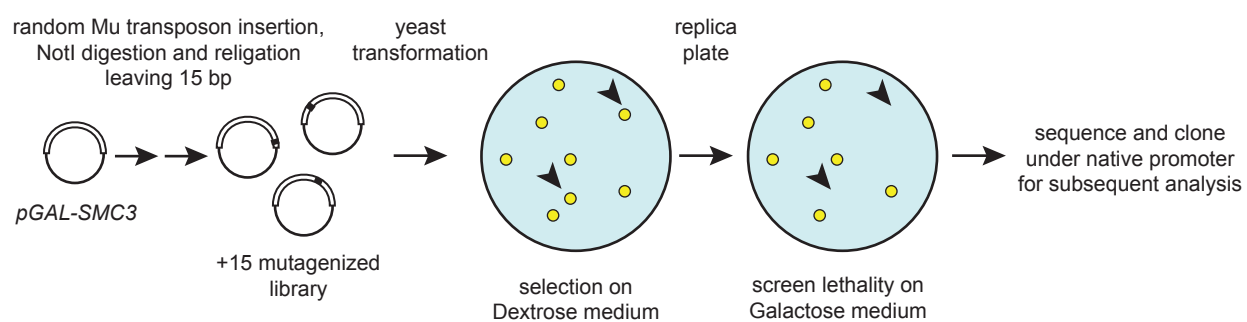

## Supplementary Figure 2

A.

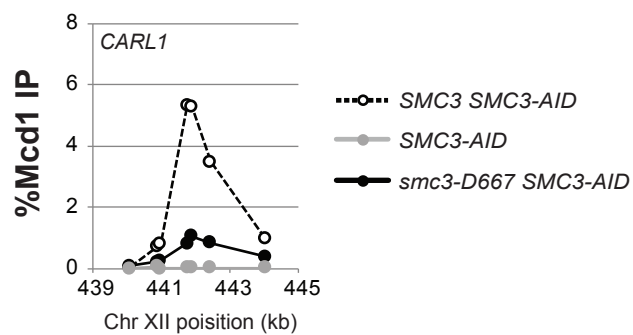

B.

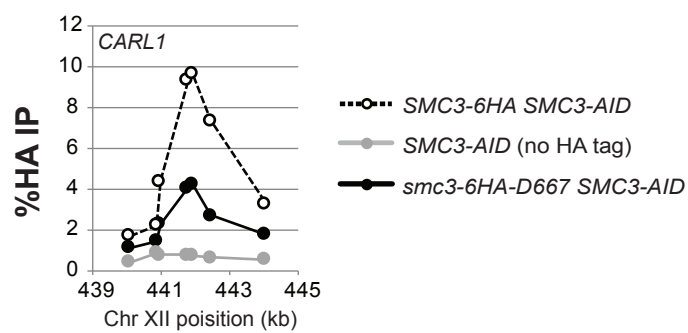

## Supplementary Figure 3

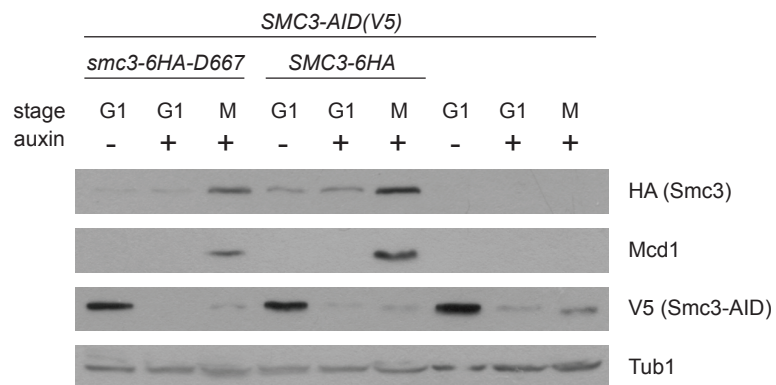

## Supplementary Figure 4

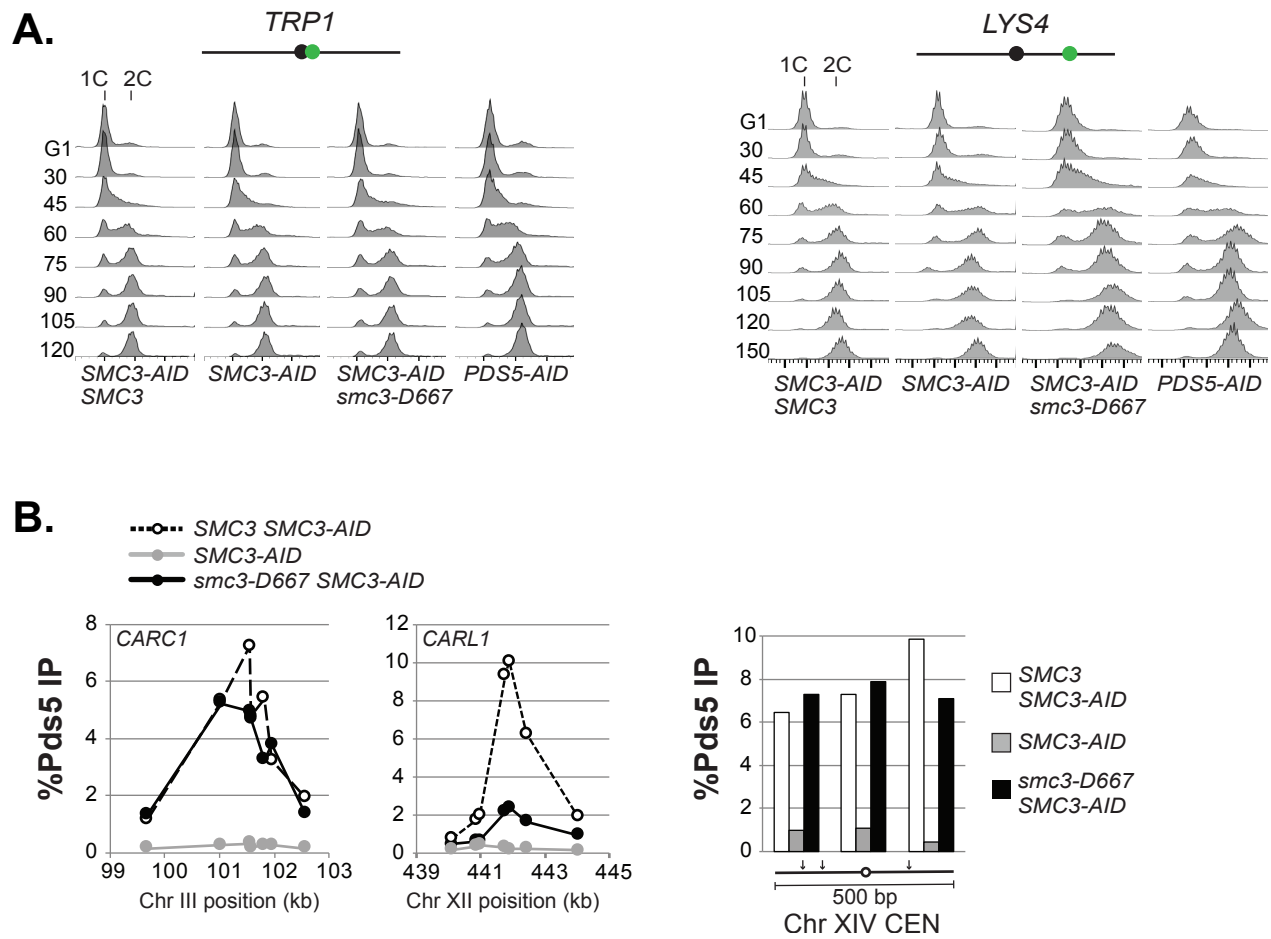

## Supplementary Figure 5

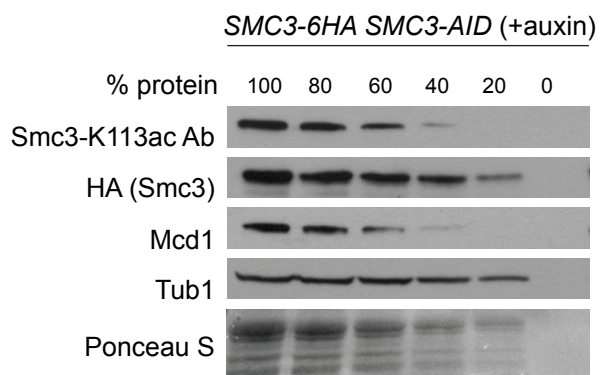

## Supplementary Table 1

| <b>Location</b> | <b>Insertion</b> | <b>Viability 5-FOA 23°C</b> |
|-----------------|------------------|-----------------------------|
| D84             | CGRND            | Not Tested (NT)             |
| D127            | AAAGD            | -                           |
| P147            | LRPQP            | -                           |
| L165            | RPQQL            | +                           |
| G171            | AAAAG            | -                           |
| N204            | AAALN            | -                           |
| Y253            | NAAAY            | +                           |
| S343            | IAAAS            | -                           |
| N517            | RPQAN            | +                           |
| D643            | CGRKD            | +                           |
| K1023           | VRPHK            | -                           |
| Y1164           | CGRKY            | NT                          |



## Supplementary Table 2

| Location | Insertion | Viability on 5-FOA 23°C |
|----------|-----------|-------------------------|
| L111     | NAAAL     | -                       |
| G171     | CGRIG     | -                       |
| A172     | AAVGA     | -                       |
| L183     | MRPQL     | -                       |
| L183     | RPHSL     | Not Tested (NT)         |
| T189     | DAAAT     | -                       |
| Q195     | IAAAQ     | -                       |
| I196     | AAAQI     | -                       |
| K198     | DAAAK     | -                       |
| S205     | AALNS     | -                       |
| E211     | AAAME     | -                       |
| E216     | FAAAE     | -                       |
| L217     | DAAAL     | -                       |
| L217     | VRPQL     | NT                      |
| Q231     | CGRNQ     | -                       |
| T233     | AAAFT     | -                       |
| L287     | RPHSL     | +                       |
| I345     | AAAIL     | -                       |
| Q347     | MRPQQ     | -                       |
| Q347     | SAAAQ     | NT                      |
| H564     | CGRIH     | +                       |
| T574     | AAAAT     | -                       |
| D662     | AAALD     | NT                      |
| G663     | AAADG     | NT                      |
| D664     | AAAGD     | -                       |
| D667     | AAAAD     | -                       |
| G670     | AAARD     | NT                      |
| G670     | CGRRG     | -                       |
| G674     | CGRTG     | +                       |
| N783     | AAALN     | +                       |
| T809     | MRPQT     | +                       |
| K818     | CGRNK     | +                       |
| S823     | VRPQS     | +                       |
| V888     | FAAAV     | -                       |
| T986     | DAAAT     | +                       |
| A1013    | DAAAA     | -                       |
| R1015    | VRPQR     | -                       |
| S1017    | VRPHS     | -                       |
| S1022    | NAAAS     | -                       |
| K1023    | CGRTK     | NT                      |
| I1026    | HAAAI     | NT                      |
| V1041    | AAAIV     | -                       |
| V1133    | RPQTV     | NT                      |
| A1135    | RPQCA     | -                       |
| A1137    | AAAIA     | NT                      |
| A1159    | CGRTA     | NT                      |
| L1160    | RPHAL     | NT                      |
| T1184    | MRPHT     | -                       |
| R1199    | VRPHR     | -                       |
